# Supplementary material
Source: PubMed Central journal article supplement (PMC5036589)

# Supporting Information

for

Effective one-pot multienzyme (OPME) synthesis of monotreme milk oligosaccharides and other sialosides containing a 4-*O*-acetyl sialic acid

Hai Yu,<sup>‡a</sup> Jie Zeng,<sup>‡a,b</sup> Yanhong Li,<sup>a</sup> Vireak Thon,<sup>§a</sup> Baojun Shi,<sup>a,c</sup> and Xi Chen<sup>\*a</sup>

<sup>a</sup>*Department of Chemistry, University of California, One Shields Avenue, Davis, CA 95616, USA. E-mail: xiichen@ucdavis.edu; Fax: +1 530 752-8995; Tel: +1 530 754-6037*

<sup>b</sup>*School of Food Science, Henan Institute of Science and Technology, Xinxiang, Henan 453003, China*

<sup>c</sup>*College of Plant Protection, Northwest A&F University, Yangling, Shaanxi 712100, China*

<sup>‡</sup>These authors contributed equally to this work

<sup>§</sup>Current address: Laboratory of Bacterial Polysaccharides, Food and Drug Administration, Bethesda, MD 20892, USA.

\*Corresponding author. E-mail: xiichen@ucdavis.edu; Fax: +1 530 752-8995; Tel: +1 530 754-6037

## Table of Contents

|                                                                                                                                                     |         |
|-----------------------------------------------------------------------------------------------------------------------------------------------------|---------|
| <b>Fig. S1</b> Mass spectrometry (MS) chromatograms of reactions catalyzed by various bacterial CMP-sialic acid synthetases (CSSs) and mutants..... | S2–S4   |
| <b>Fig. S2</b> Mass spectrometry (MS) chromatograms of human influenza virus neuraminidase-catalyzed hydrolysis of Neu4,5Ac <sub>2</sub> α3Lac..... | S5–S6   |
| <sup>1</sup> H and <sup>13</sup> C NMR spectra of Neu4,5Ac <sub>2</sub> ( <b>1</b> ).....                                                           | S7      |
| <sup>1</sup> H and <sup>13</sup> C NMR spectra of Neu4Ac5Gc ( <b>2</b> ) .....                                                                      | S8      |
| <sup>1</sup> H and <sup>13</sup> C NMR spectra of GlcNAcβ3LacβProN <sub>3</sub> (Lc <sub>3</sub> ).....                                             | S9      |
| <sup>1</sup> H and <sup>13</sup> C NMR spectra of LNnTβProN <sub>3</sub> ( <b>23</b> ).....                                                         | S10     |
| <sup>1</sup> H and <sup>13</sup> C NMR spectra of sialosides <b>24–41</b> .....                                                                     | S11–S28 |

**Fig. S1** Mass spectrometry (MS) chromatograms of reactions catalyzed by various bacterial CMP-sialic acid synthetases (CSSs) and mutants. Reactions were performed in a total volume of 10  $\mu$ L containing Tris-HCl buffer (100 mM, pH 7.1),  $MgCl_2$  (20 mM), Neu4,5Ac<sub>2</sub> (10 mM), and CTP (10 mM). After the addition of a CMP-sialic acid synthetase, the reaction was allowed to proceed for 6 h at 37 °C. The precipitates in the reaction mixture were removed by centrifugation and aliquots of 1  $\mu$ L clear solution were diluted 100 times and injected for MS analysis.

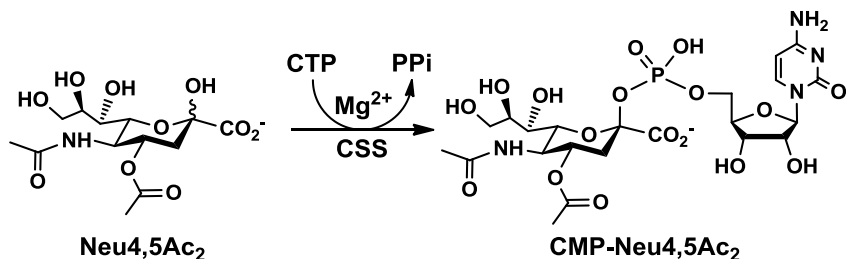

Molecular ion  $m/z$ : Neu5Ac, 308.0982; Neu4,5Ac<sub>2</sub>, 350.1087;  
 CMP-Neu5Ac, 613.1394; CMP-Neu4,5Ac<sub>2</sub>, 655.1500;  
 CTP, 481.9767; CDP, 402.0104; CMP, 322.0440

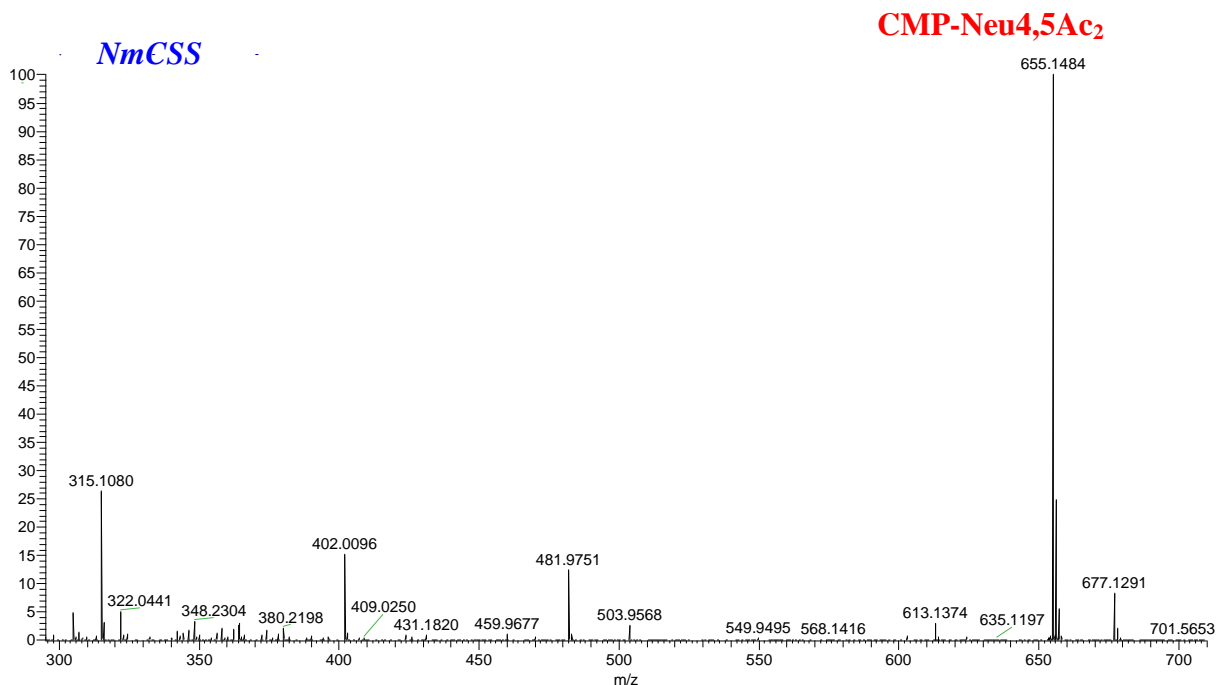

**CMP-Neu4,5Ac<sub>2</sub>**

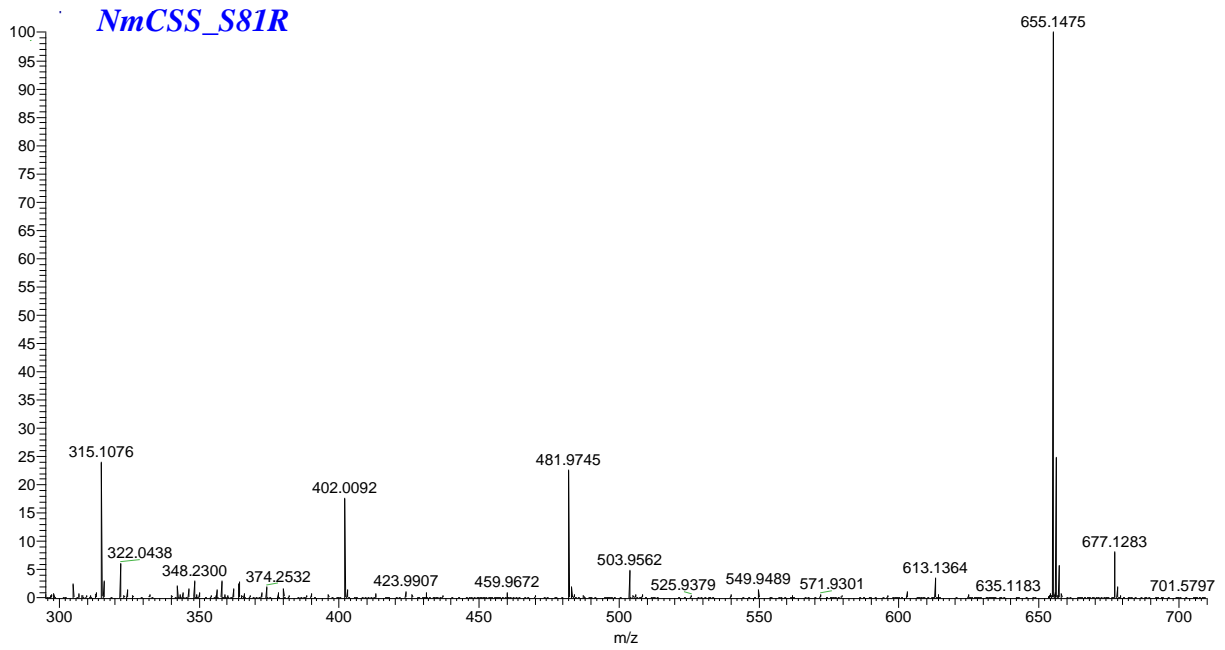

**CMP-Neu4,5Ac<sub>2</sub>**

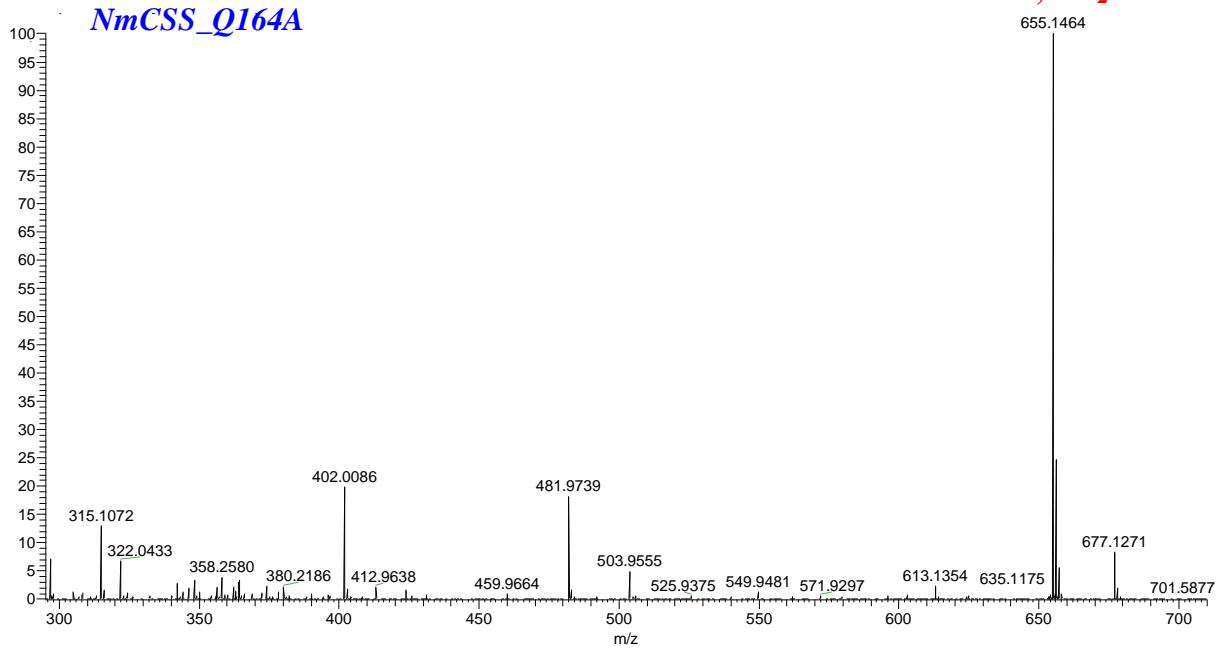

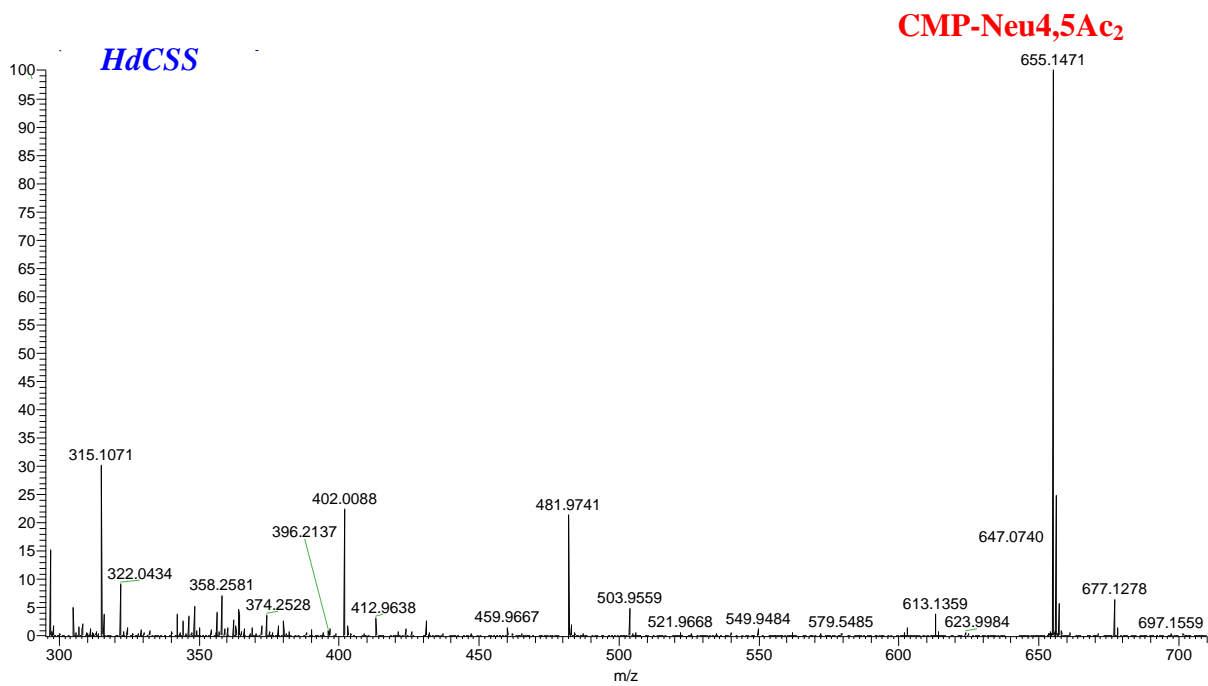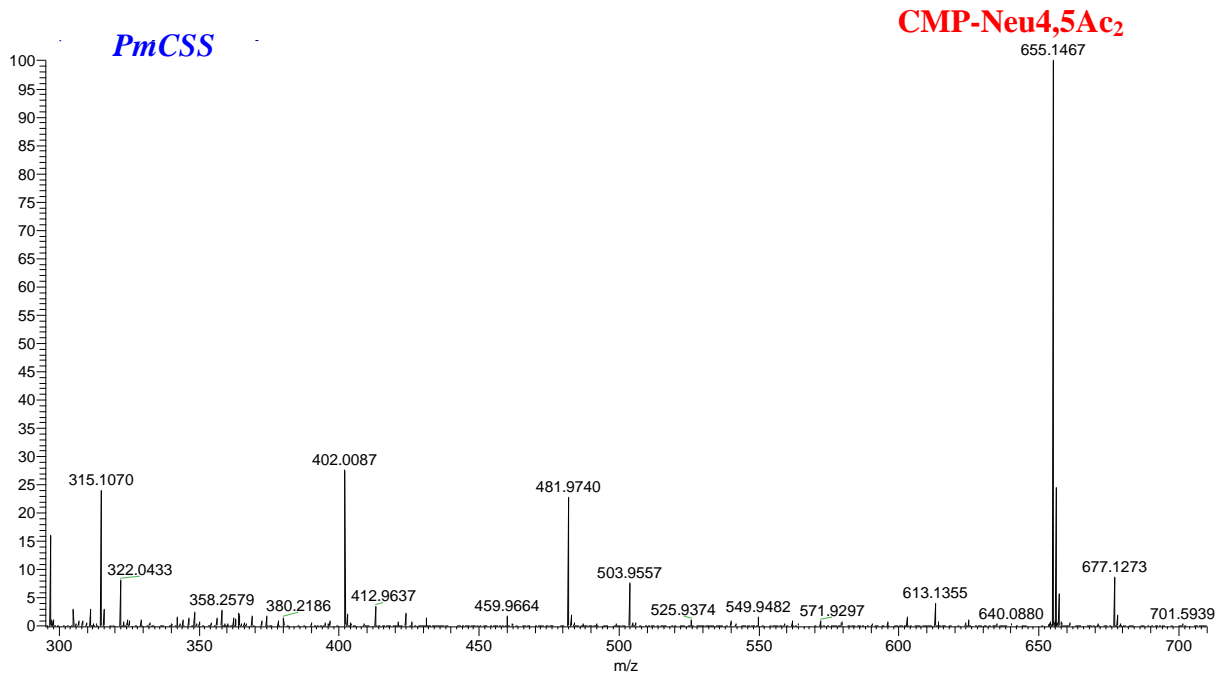

**Fig. S2** Mass spectrometry (MS) chromatograms of human influenza virus neuraminidase-catalyzed hydrolysis of Neu4,5Ac<sub>2</sub>α3Lac

A/Udorn/307/72 H3N2 (A/Udorn72)

Ud 10mM 1 #19-147 RT: 0.18-1.39 AV: 129 NL: 1.25E6  
T: FTMS - p ESI Full ms [195.00-1000.00]

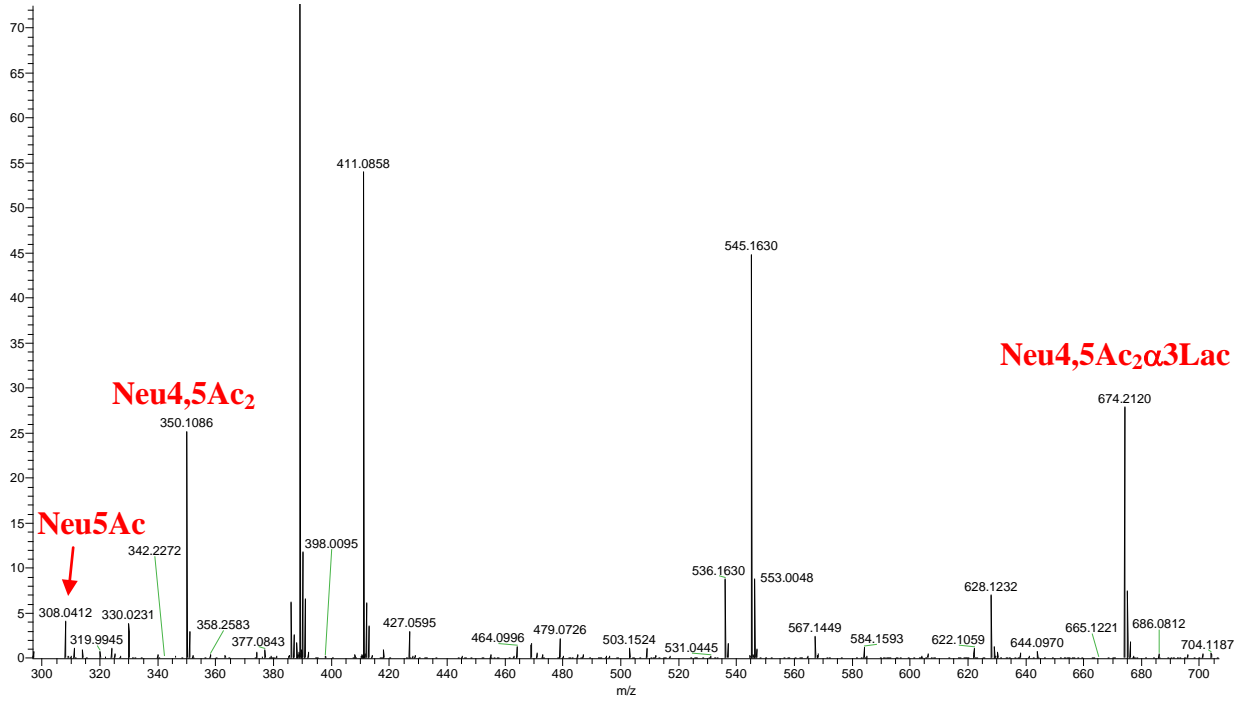

A/Memphis/71 H3N1 (A/Mem71)

Mem 10mM 1 #21-133 RT: 0.19-1.26 AV: 113 NL: 7.69E5  
T: FTMS - p ESI Full ms [195.00-1000.00]

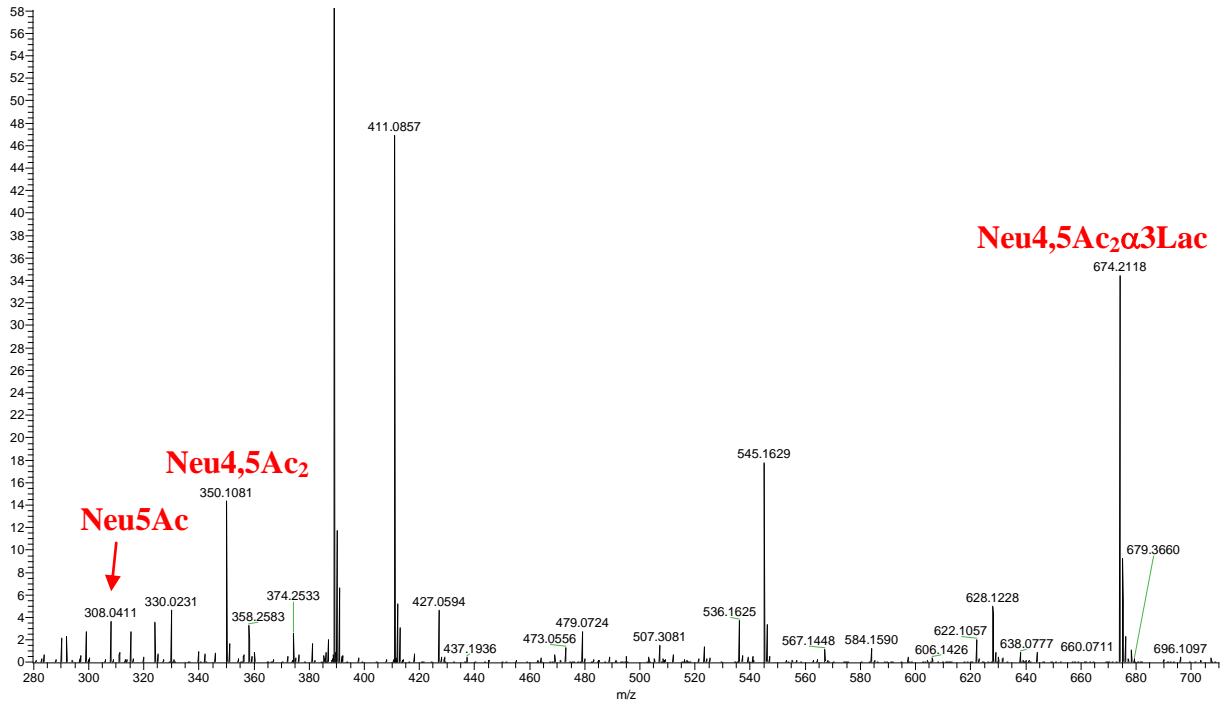

### A/Puerto Rico/34/8 H1N1 (A/PR8)

PR 10mM1 #17-135 RT: 0.15-1.27 AV: 119 NL: 1.47E6  
T: FTMS - p ESI Full ms [195.00-1000.00]

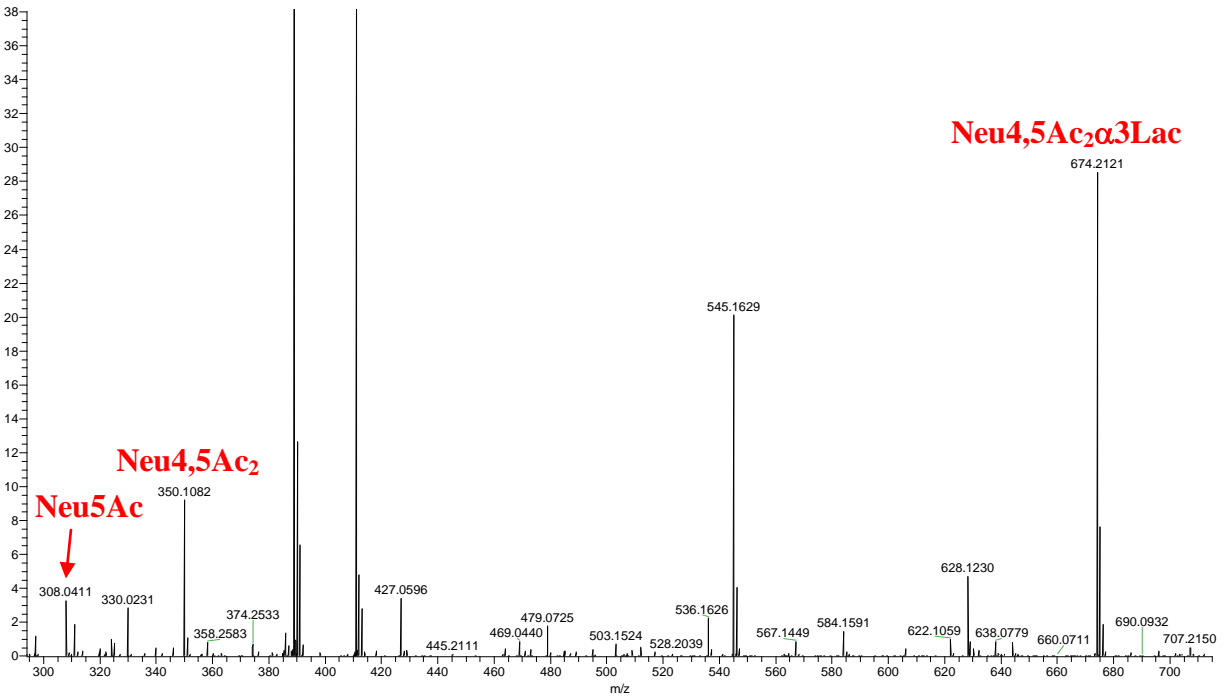

### A/Philippines/2/82/X-79 H3N2 (A/Philips)

Phi 10mM1 #22-130 RT: 0.20-1.23 AV: 109 NL: 1.33E6  
T: FTMS - p ESI Full ms [195.00-1000.00]

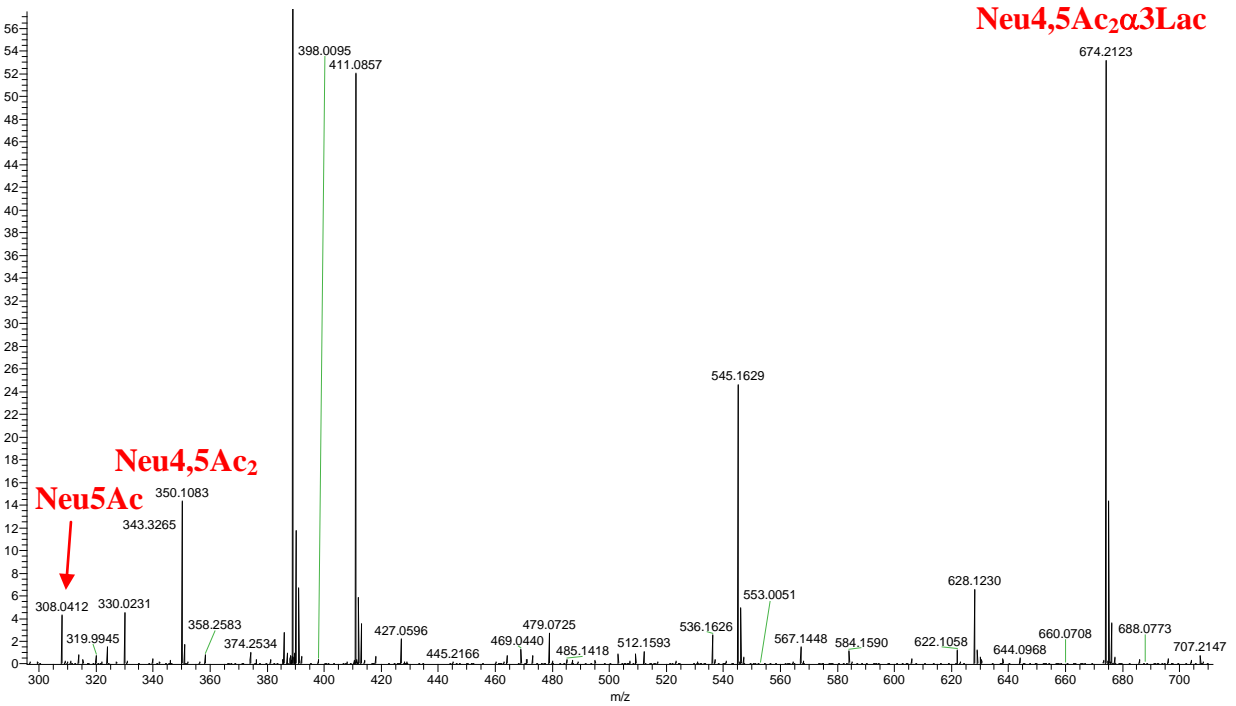

$^1\text{H}$  and  $^{13}\text{C}$  NMR spectra of Neu4,5Ac<sub>2</sub> (**1**)

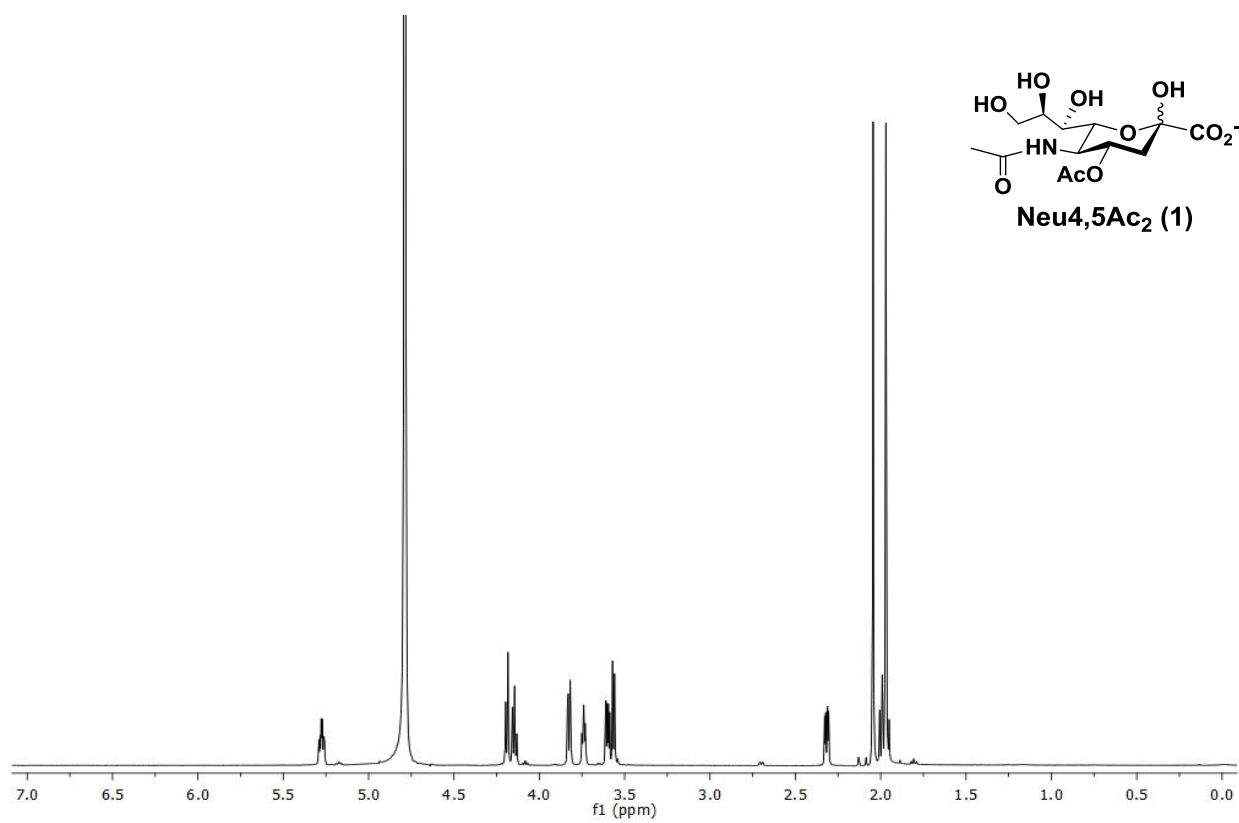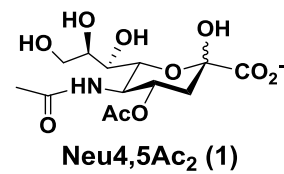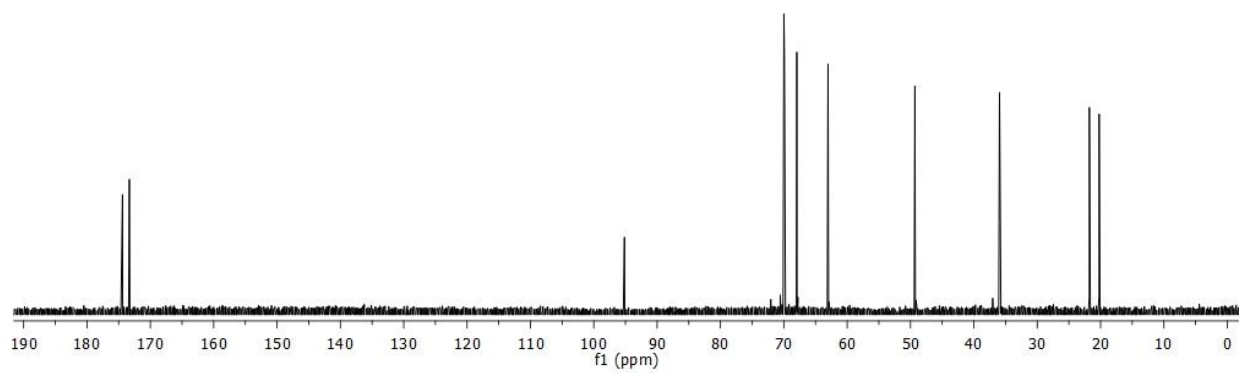

$^1\text{H}$  and  $^{13}\text{C}$  NMR spectra of Neu4Ac5Gc (**2**)

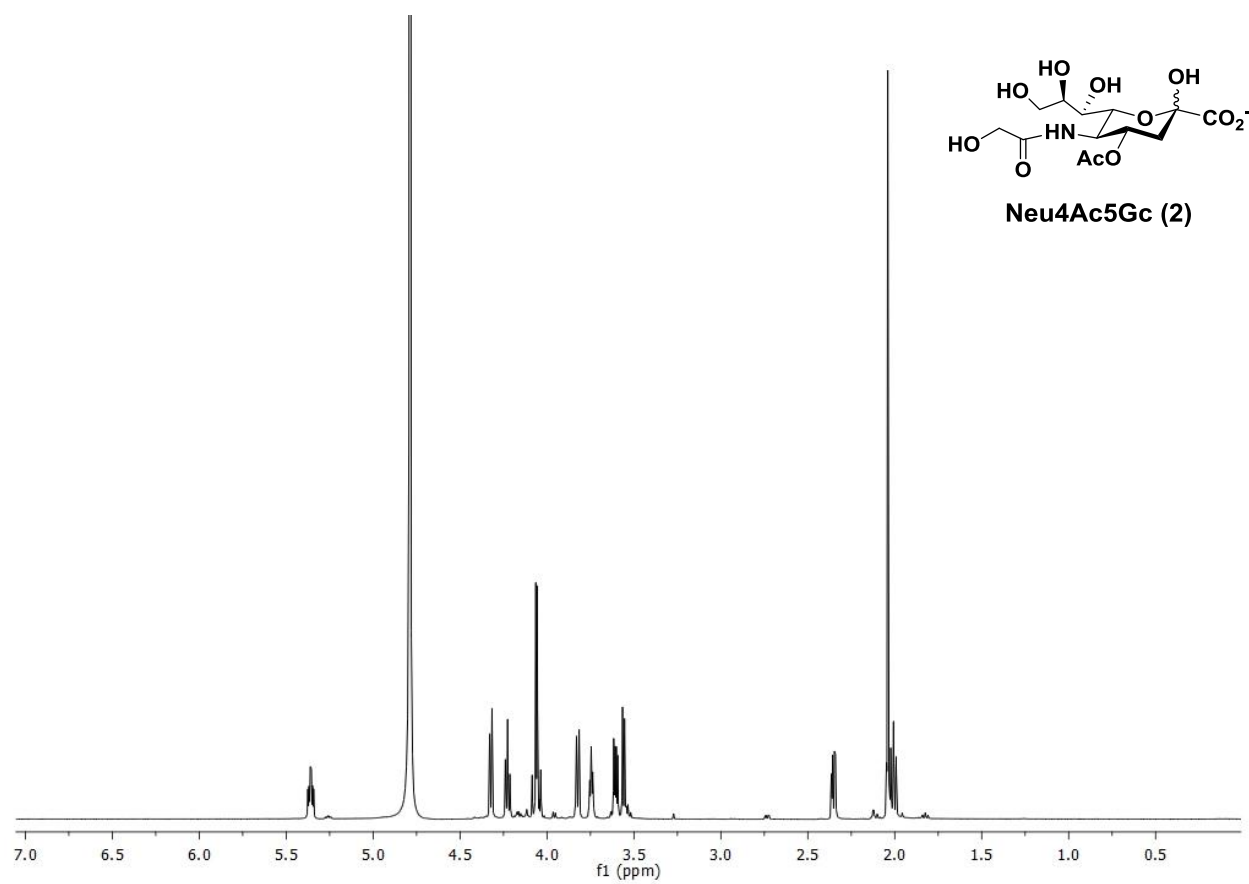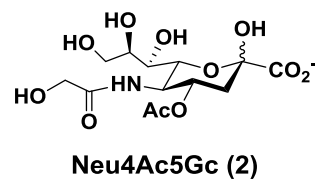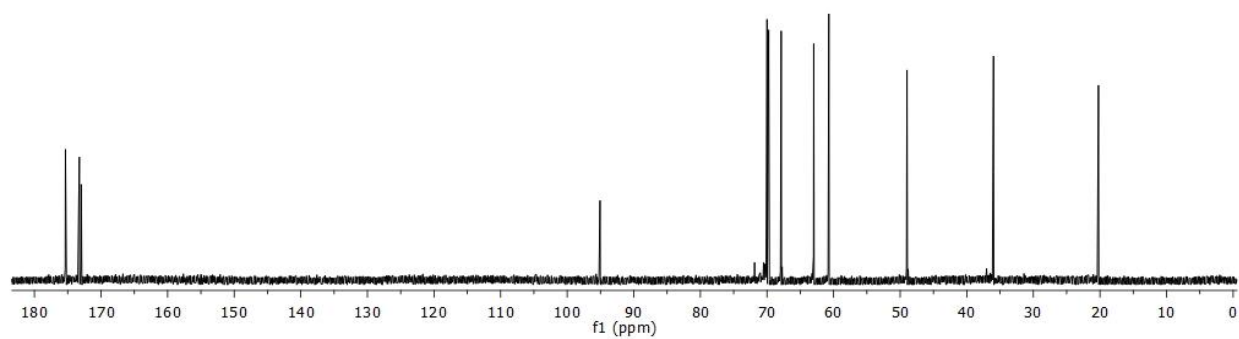



$^1\text{H}$  and  $^{13}\text{C}$  NMR spectra of GlcNAc $\beta$ 3Lac $\beta$ ProN $_3$  (Lc $_3$ )

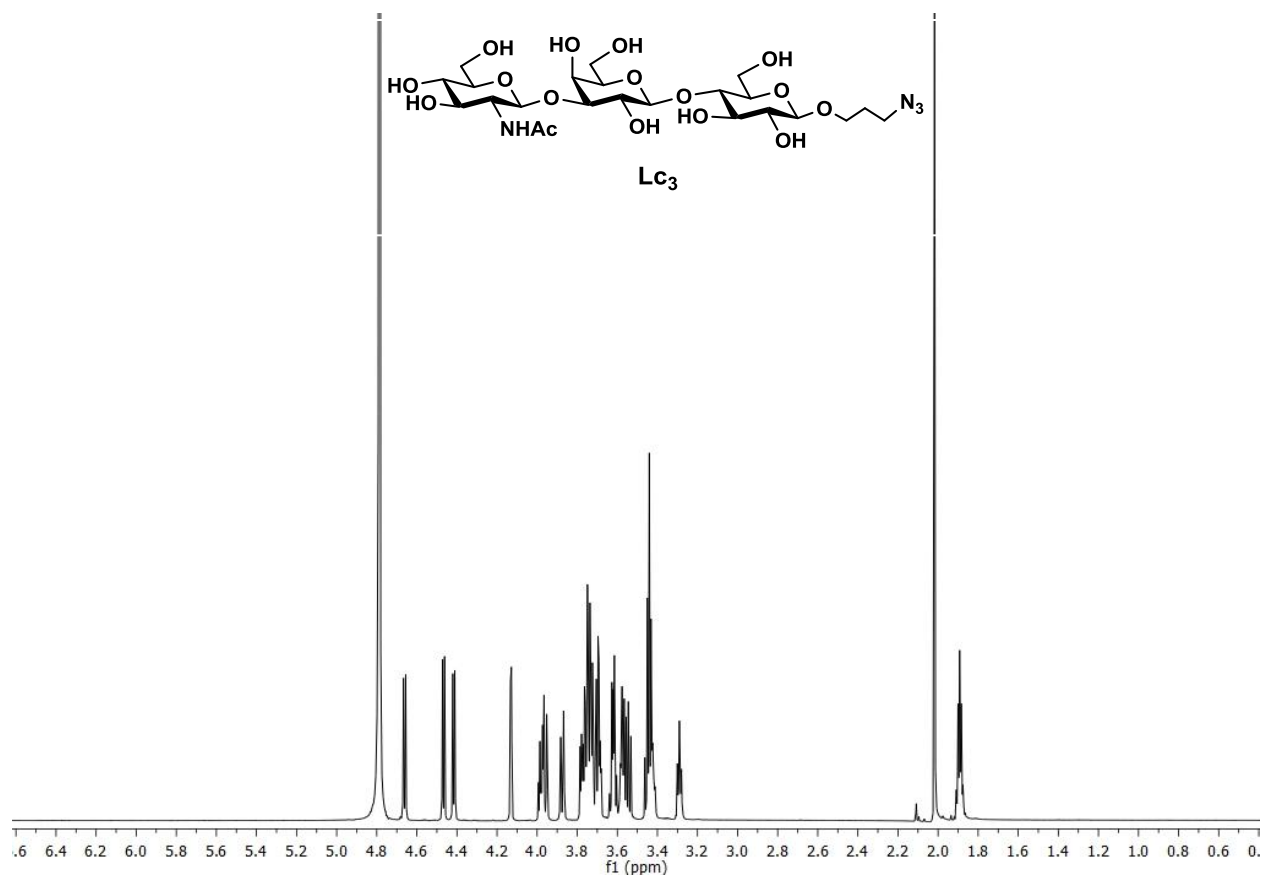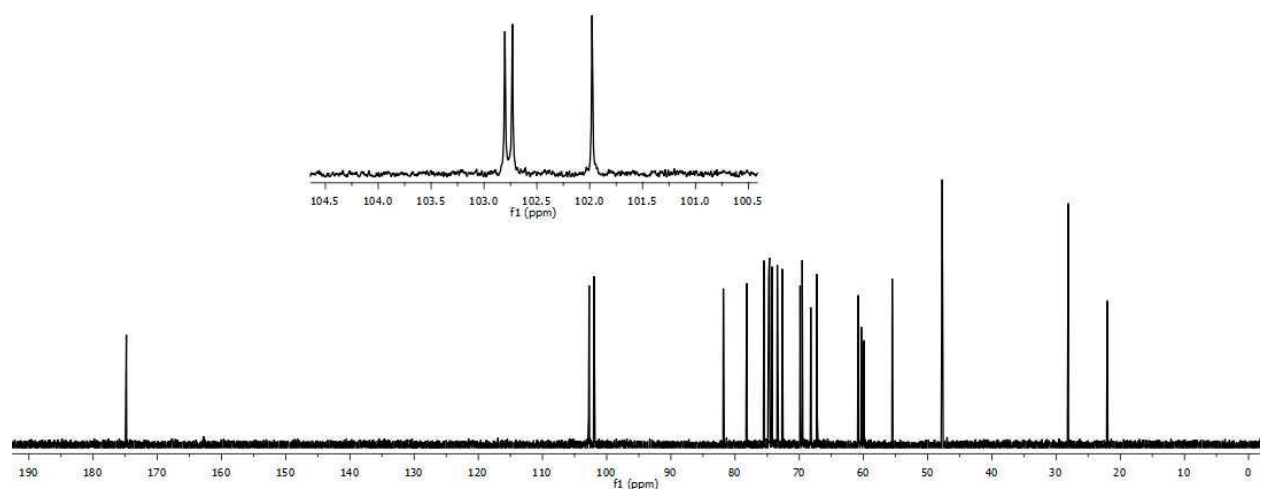

$^1\text{H}$  and  $^{13}\text{C}$  NMR spectra of LNnT $\beta$ ProN $_3$  (**23**)

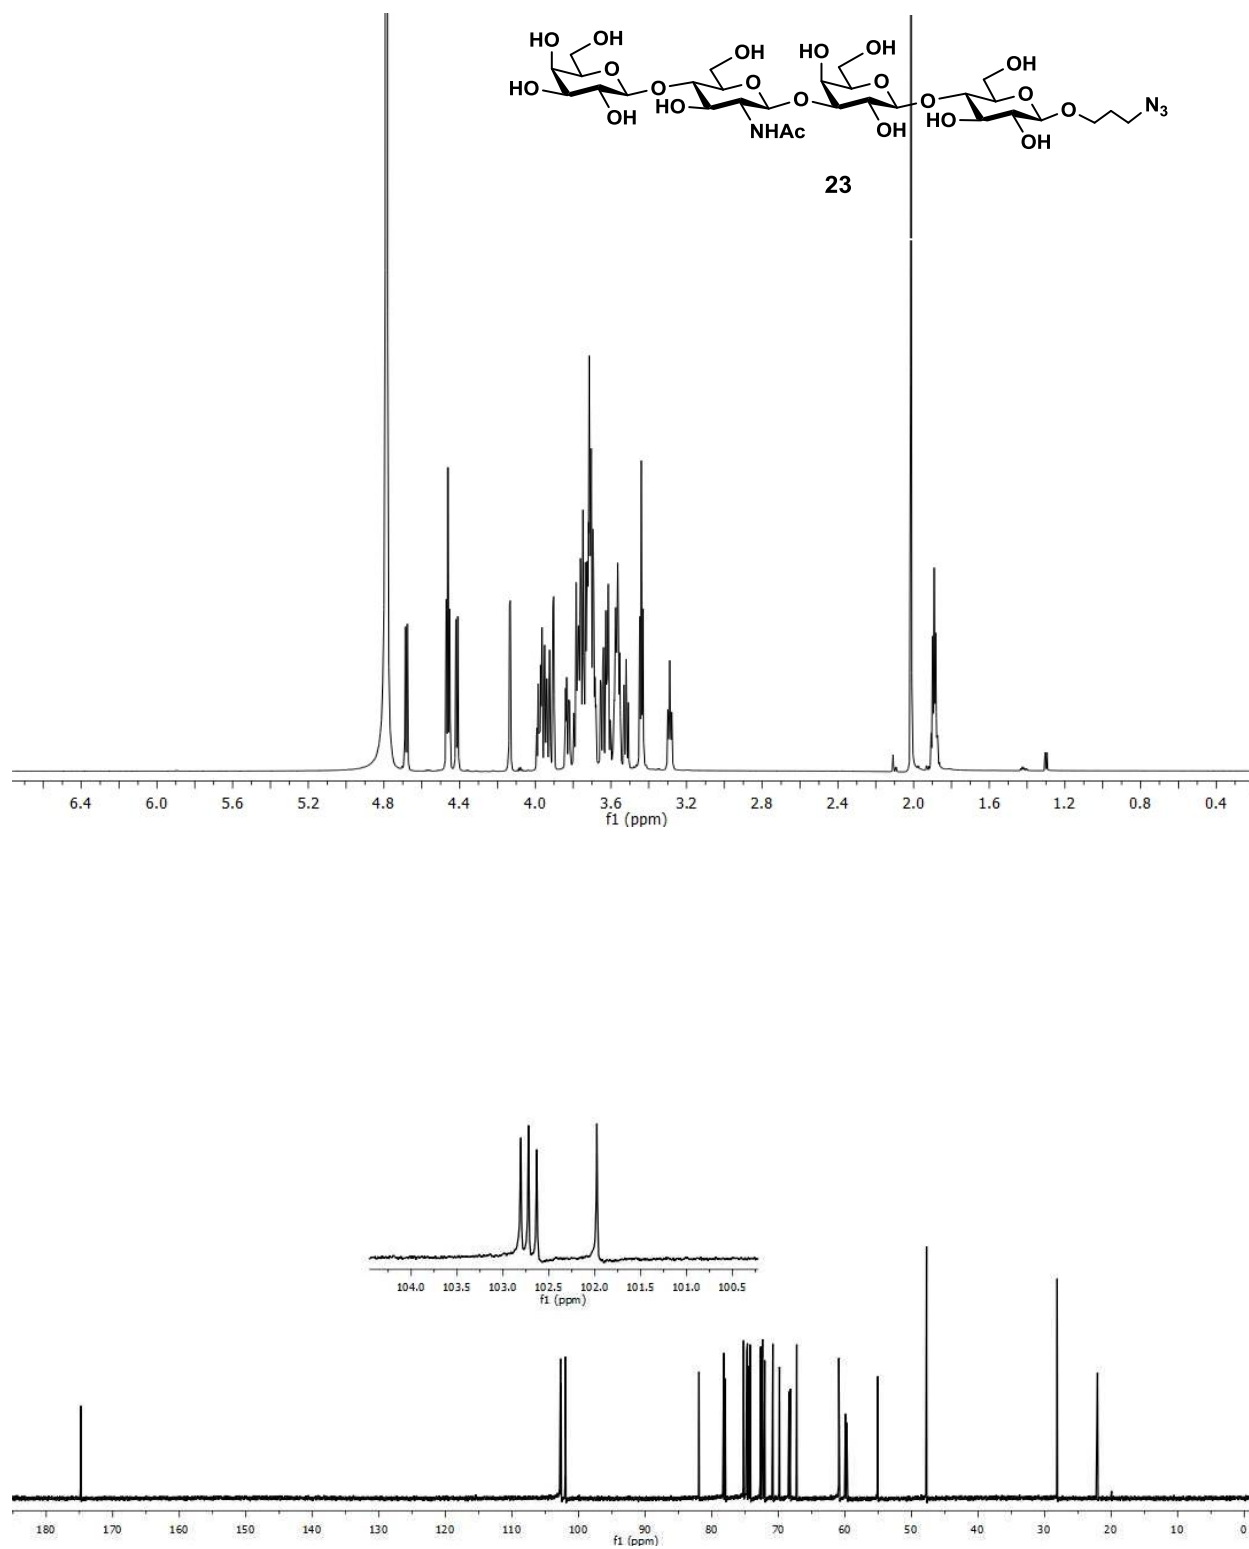

$^1\text{H}$  and  $^{13}\text{C}$  NMR spectra of Neu4,5Ac $_2$  $\alpha$ 3Lac (**24**)

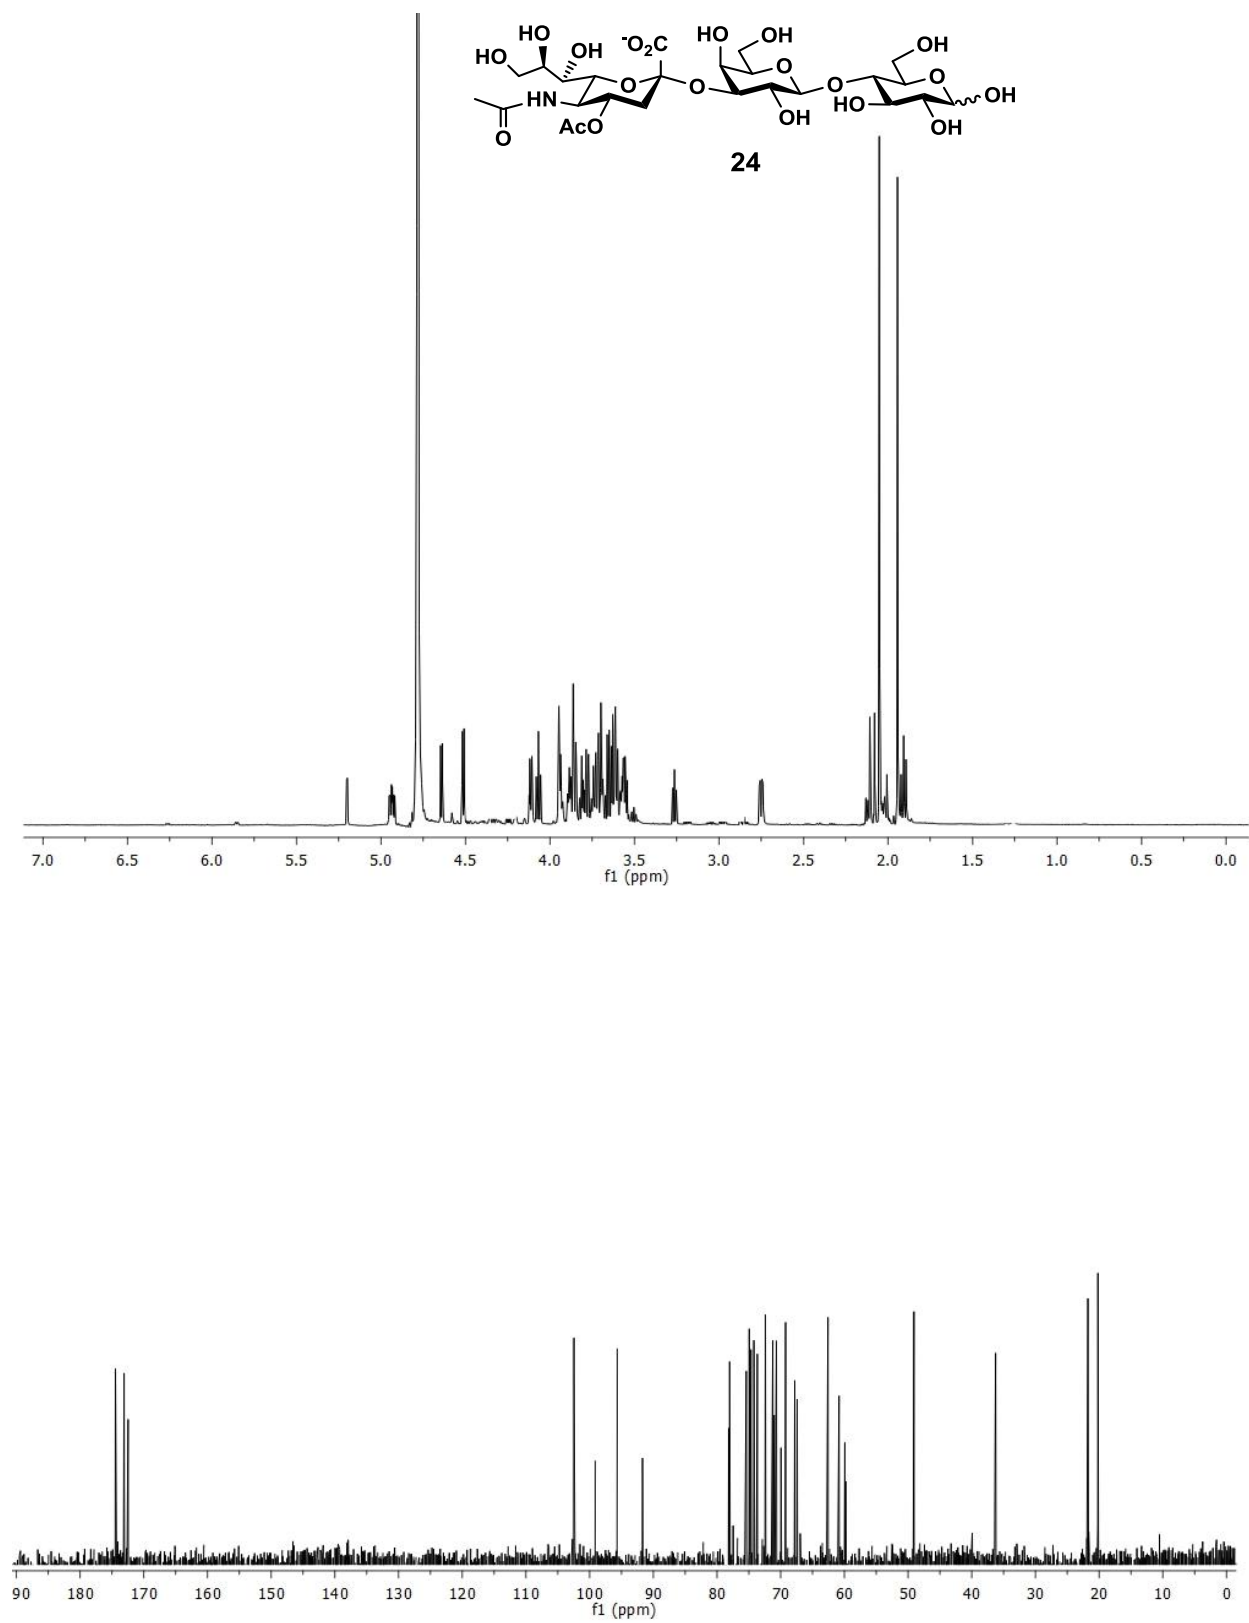

$^1\text{H}$  and  $^{13}\text{C}$  NMR spectra of Neu4,5Ac<sub>2</sub>α3LNnT (**25**)

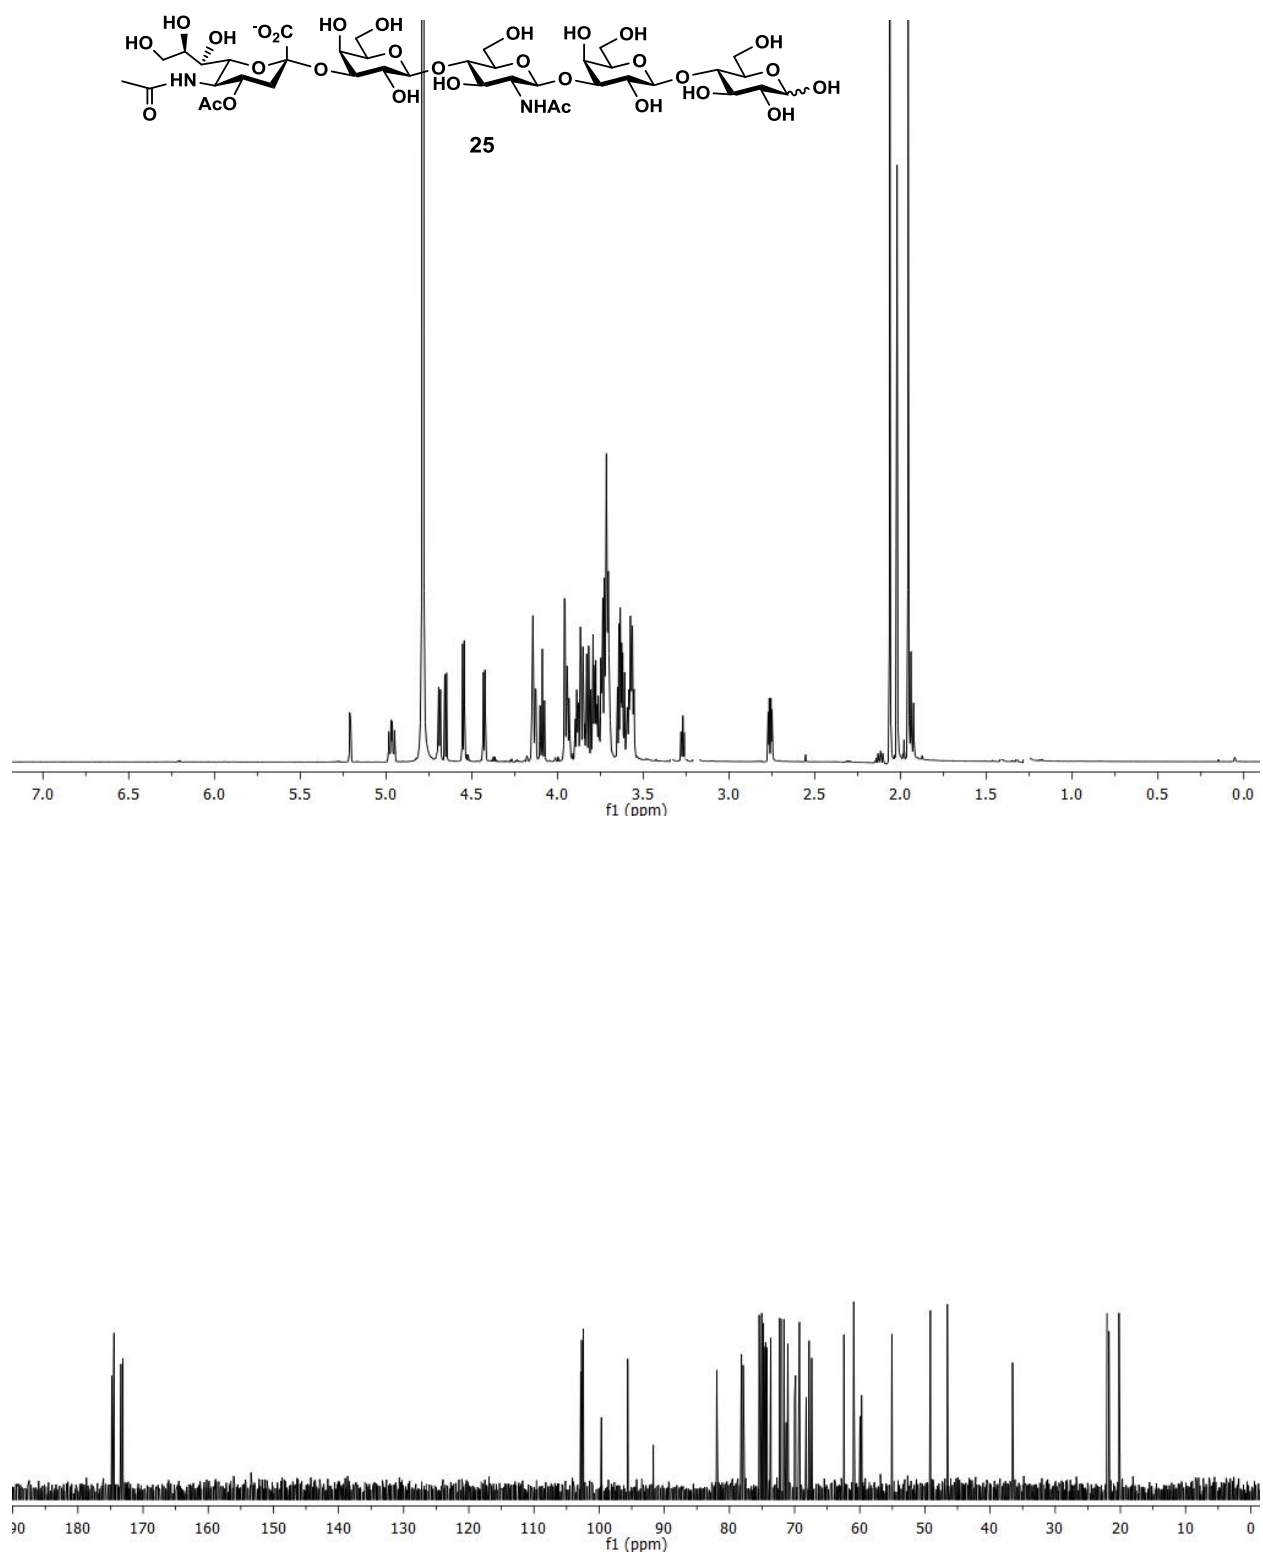

$^1\text{H}$  and  $^{13}\text{C}$  NMR spectra of Neu4,5Ac<sub>2</sub> $\alpha$ 3LNT (**26**)

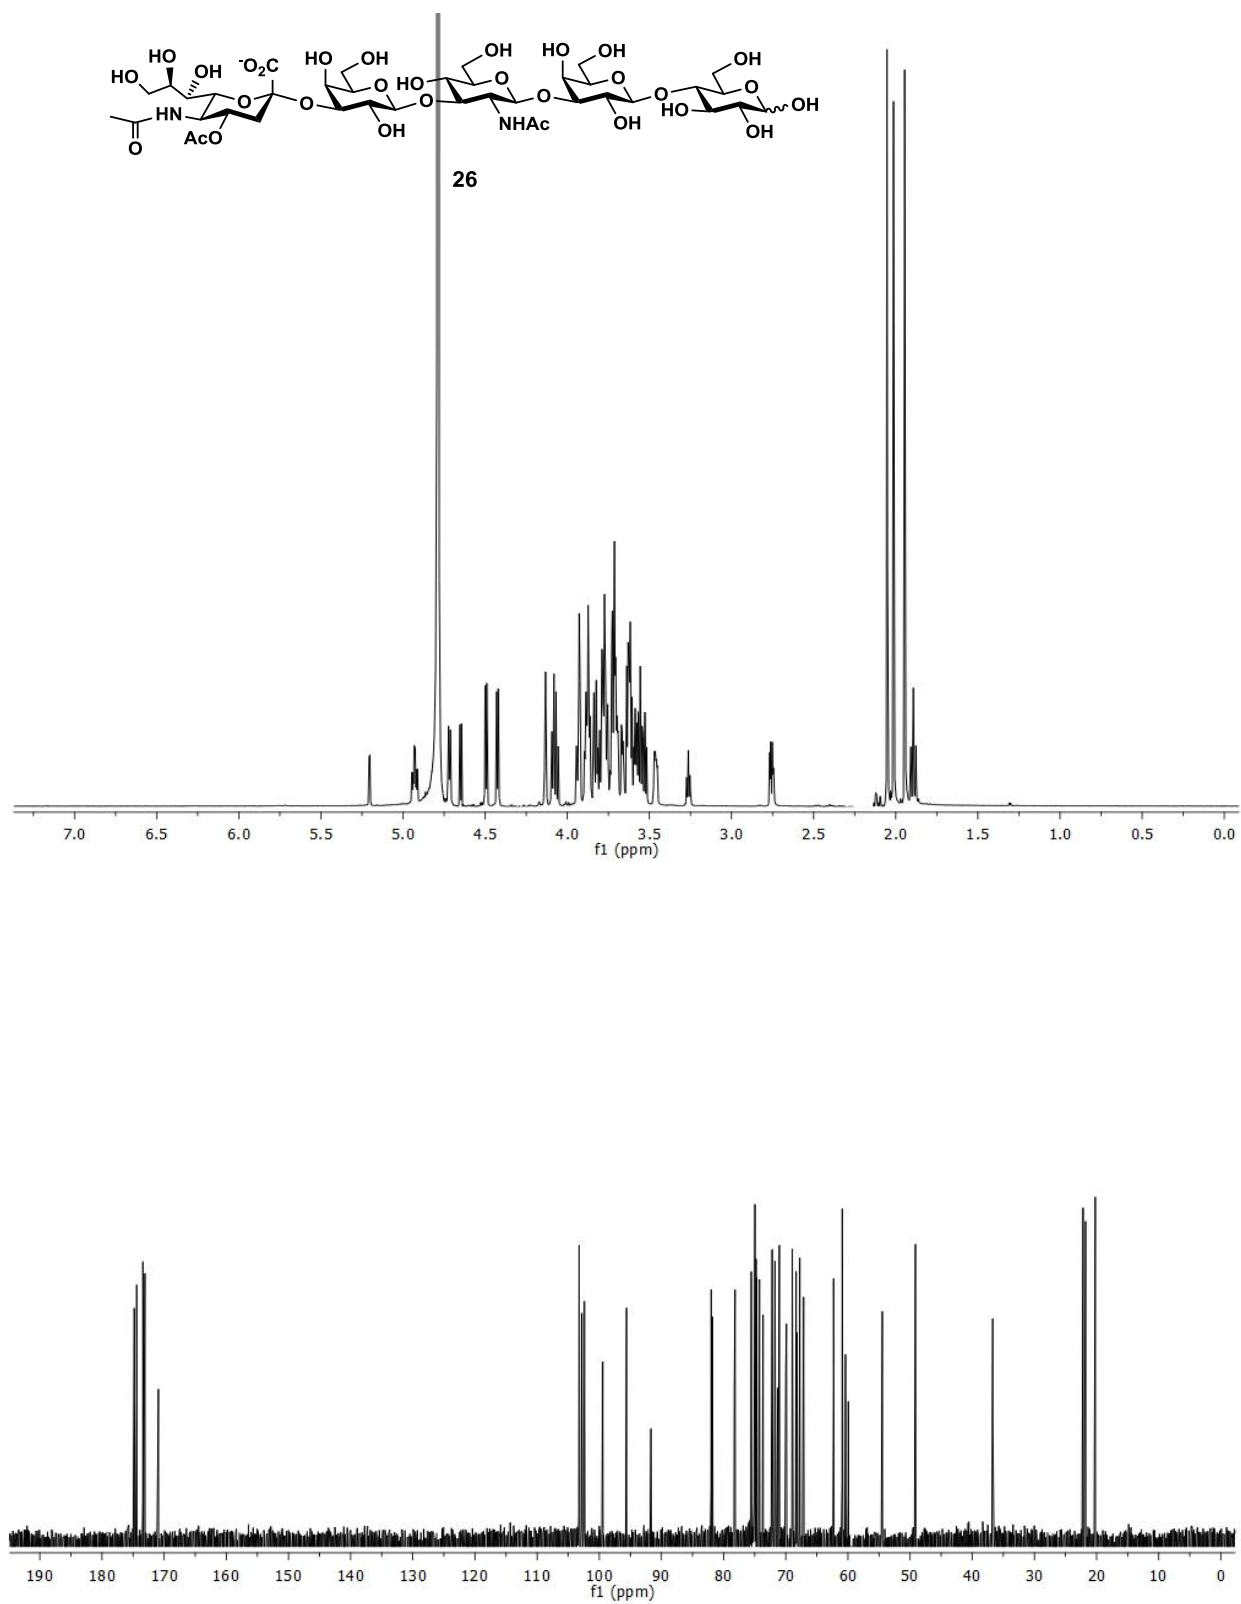

$^1\text{H}$  and  $^{13}\text{C}$  NMR spectra of Neu4,5Ac $_2$  $\alpha$ 3Gal $\beta$ pNP (**27**)

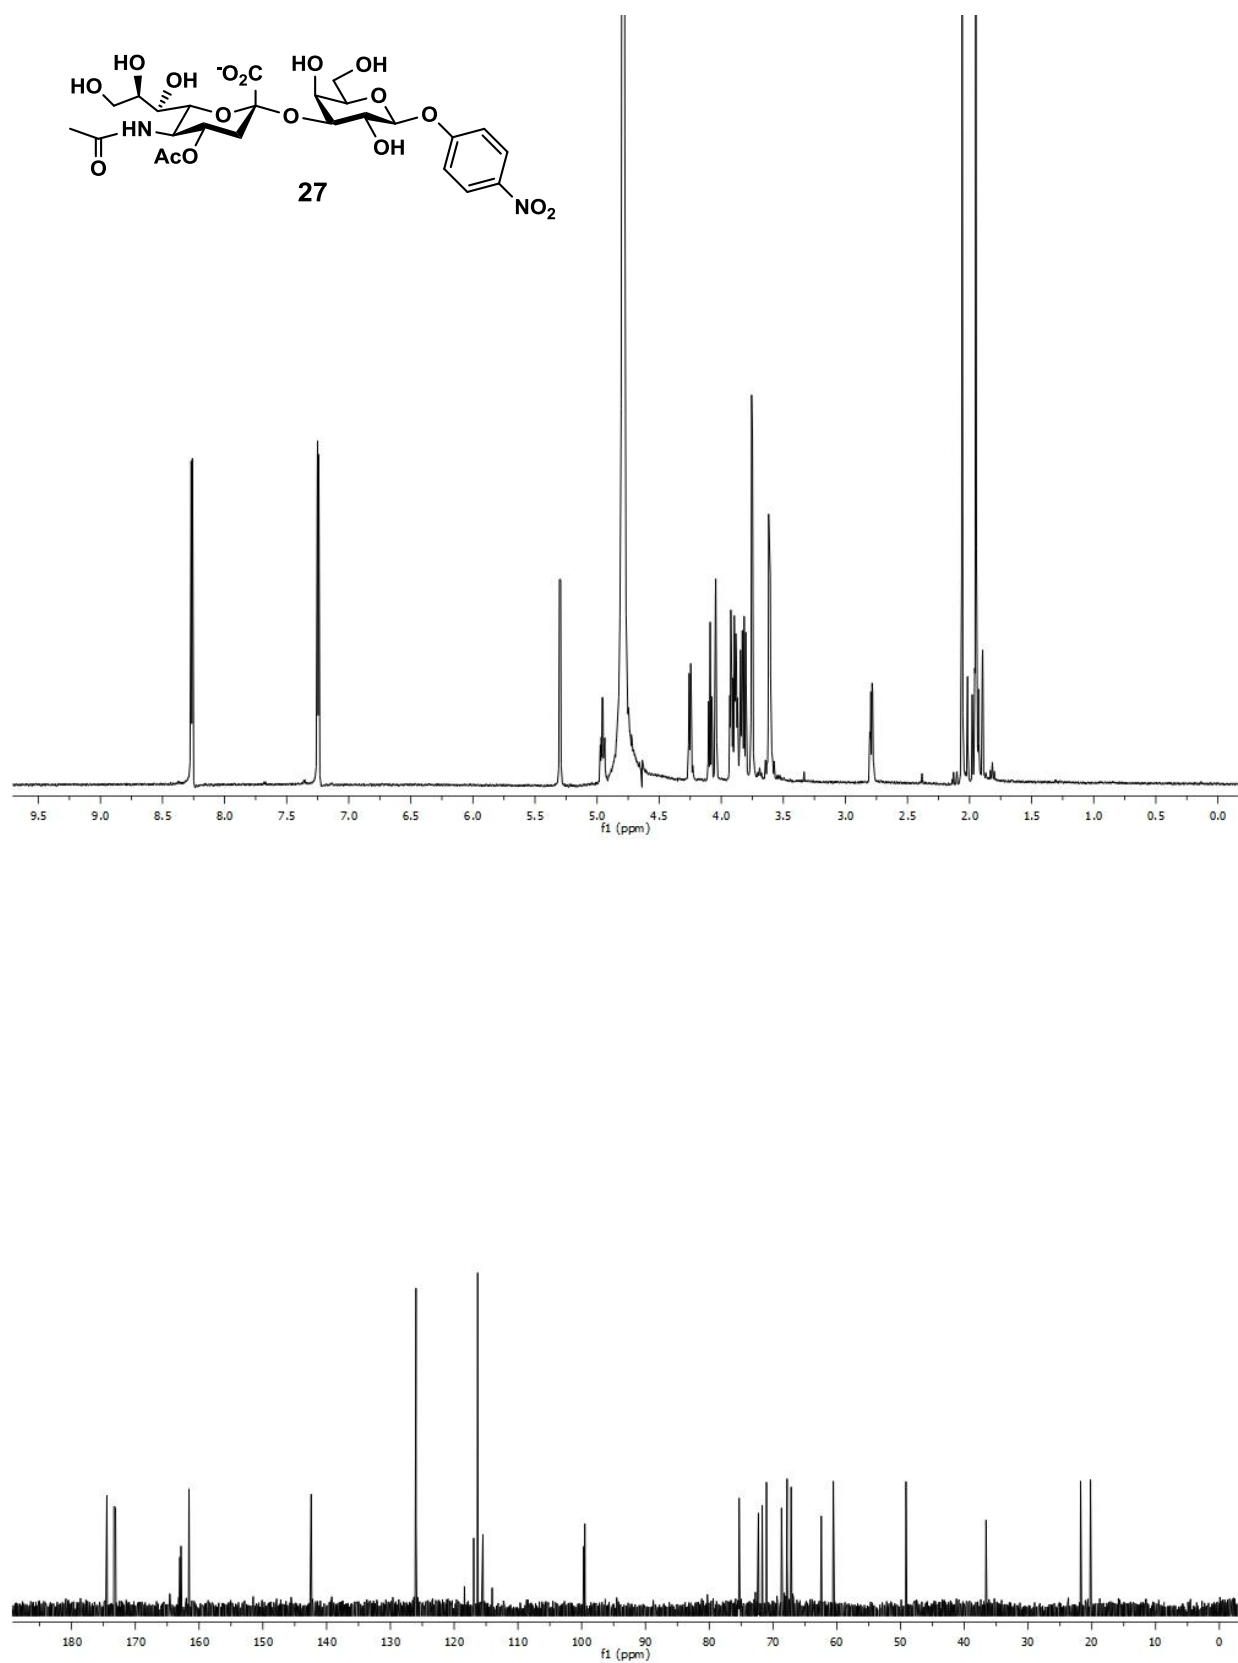

$^1\text{H}$  and  $^{13}\text{C}$  NMR spectra of Neu4,5Ac $_2$  $\alpha$ 3Lac $\beta$ ProN $_3$  (**28**)

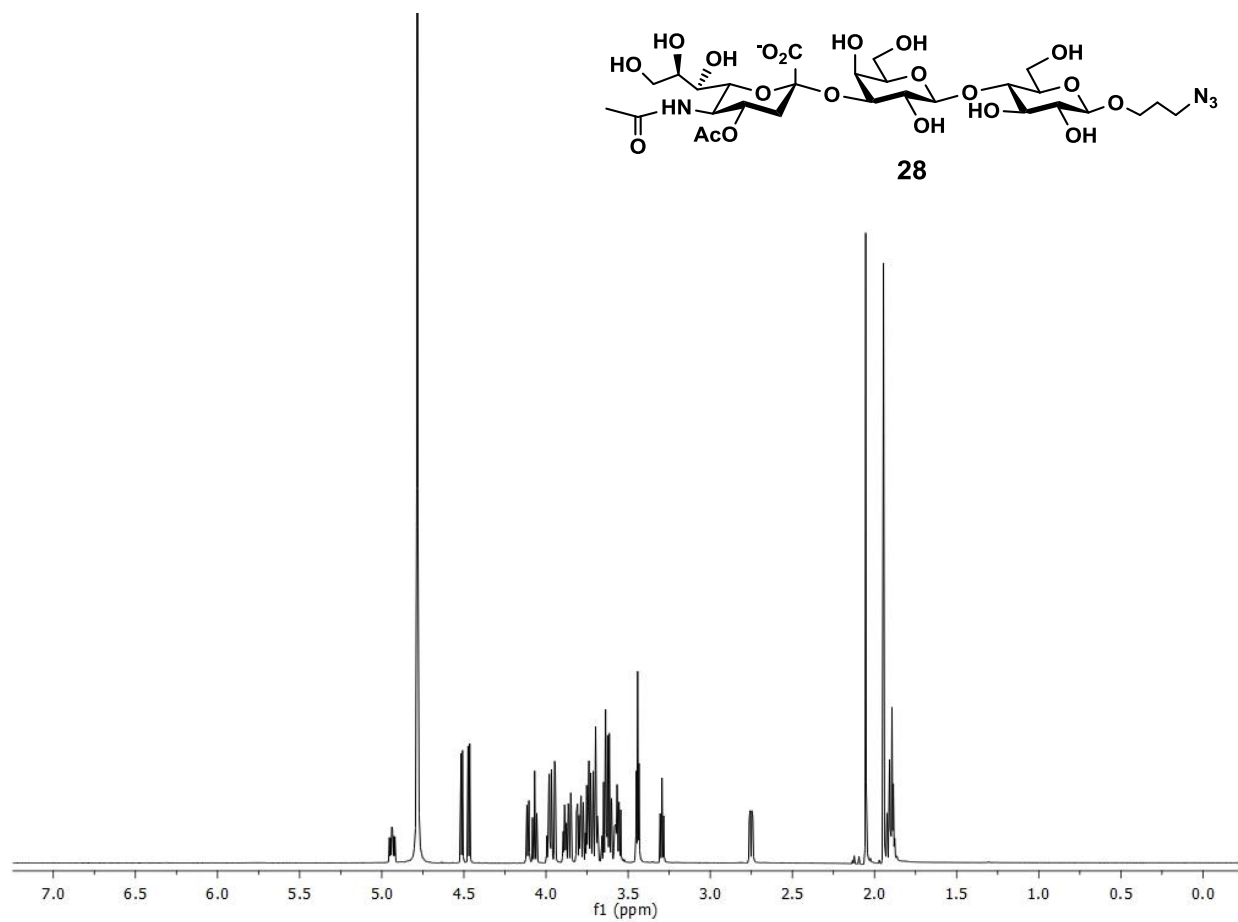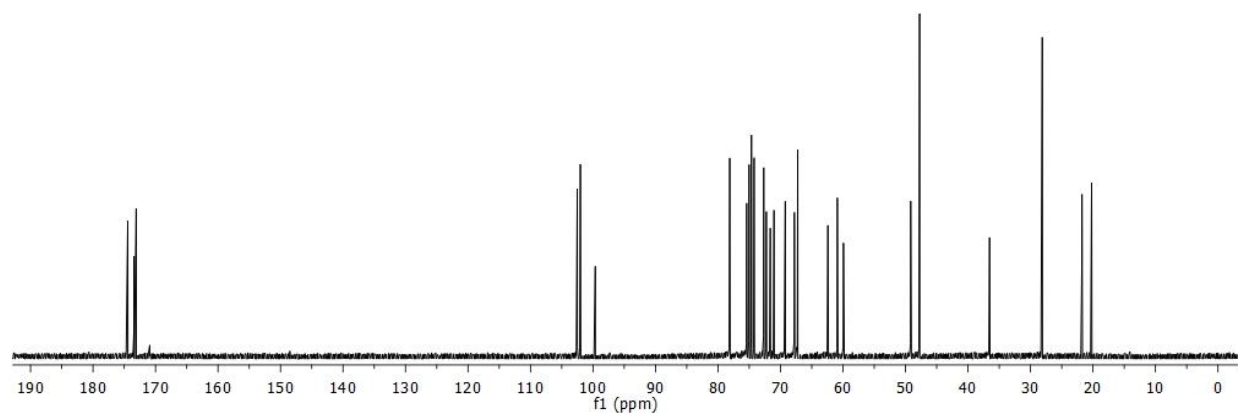

$^1\text{H}$  and  $^{13}\text{C}$  NMR spectra of Neu4,5Ac<sub>2</sub>α3LacNAcβProN<sub>3</sub> (**29**)

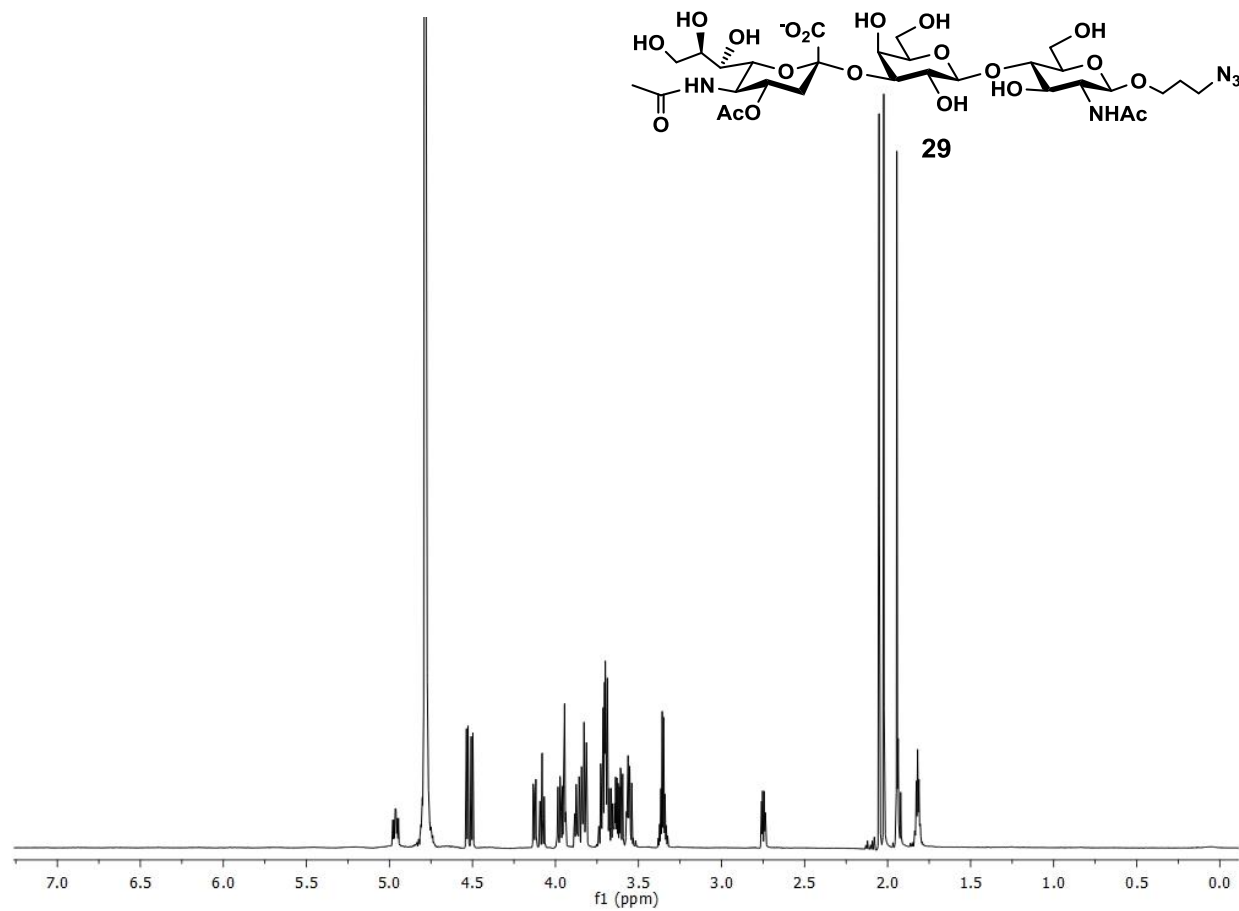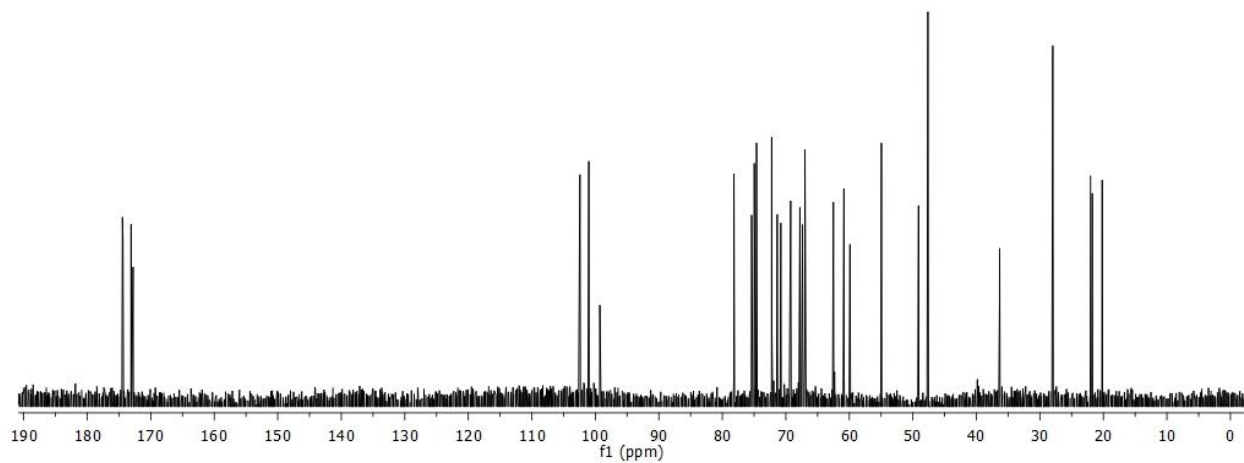



$^1\text{H}$  and  $^{13}\text{C}$  NMR spectra of Neu4,5Ac $_2$  $\alpha$ 3Gal $\beta$ 3GlcNAc $\beta$ ProN $_3$  (**30**)

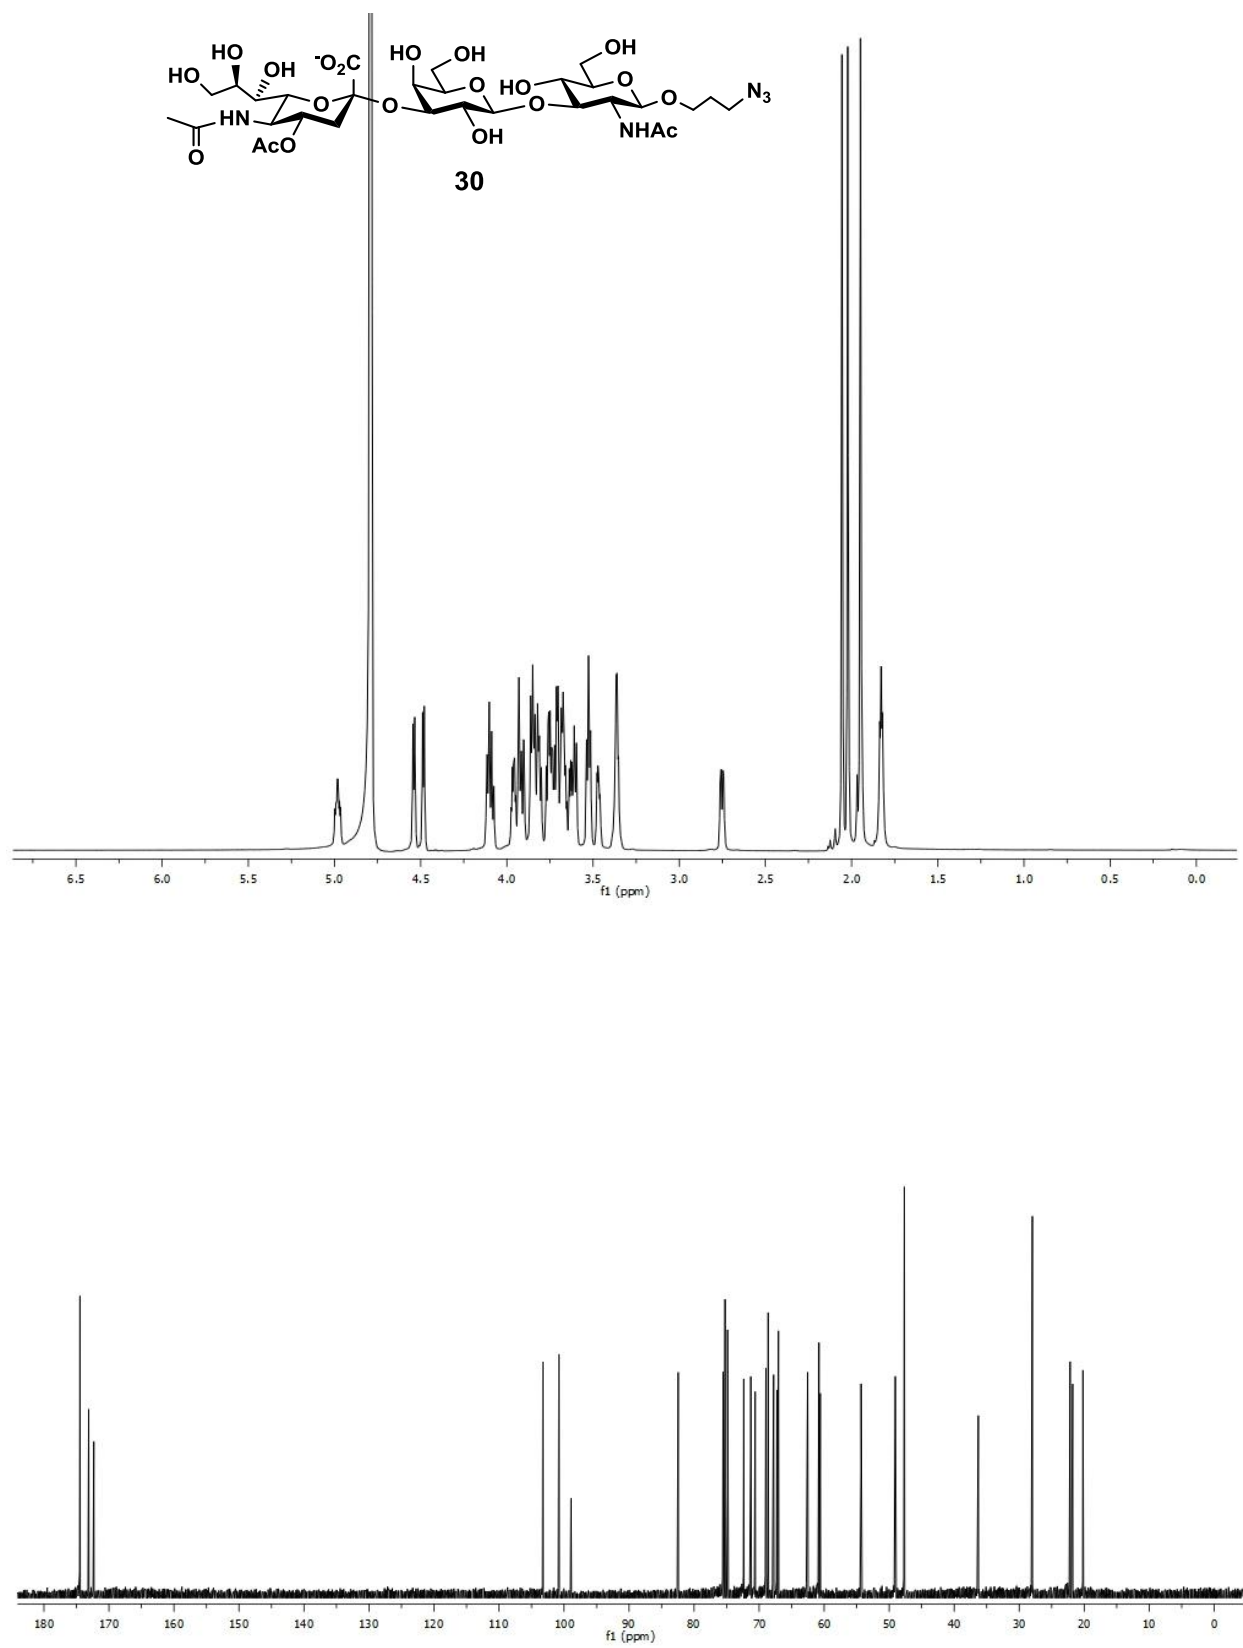

$^1\text{H}$  and  $^{13}\text{C}$  NMR spectra of Neu4,5Ac<sub>2</sub>α3Galβ3GlcNAcαProN<sub>3</sub> (**31**)

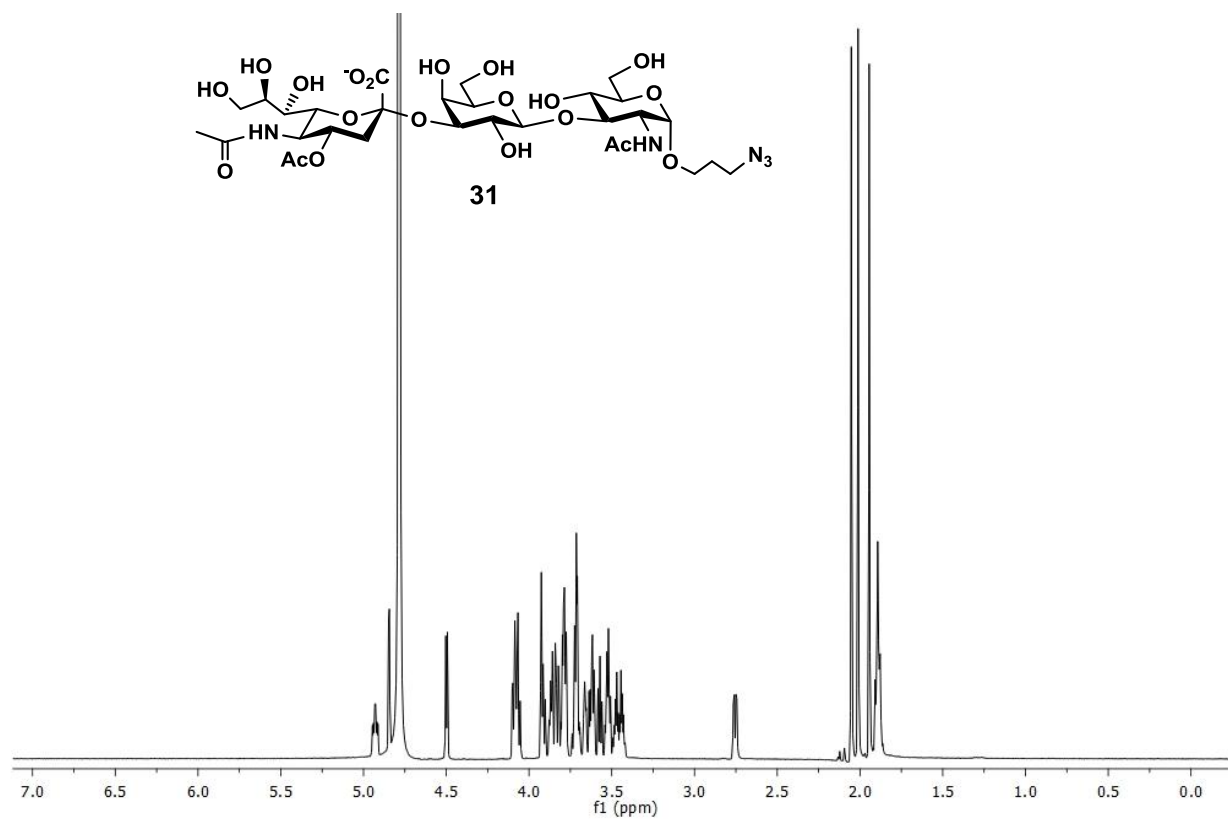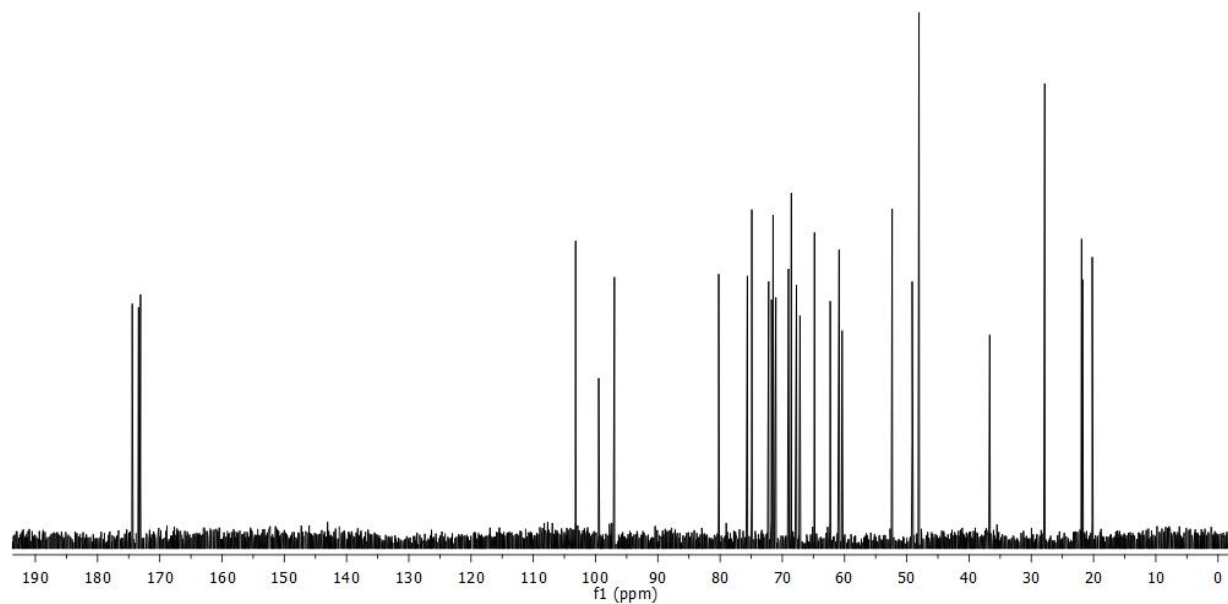

$^1\text{H}$  and  $^{13}\text{C}$  NMR spectra of Neu4,5Ac<sub>2</sub>α3Galβ3GalNAcβProN<sub>3</sub> (**32**)

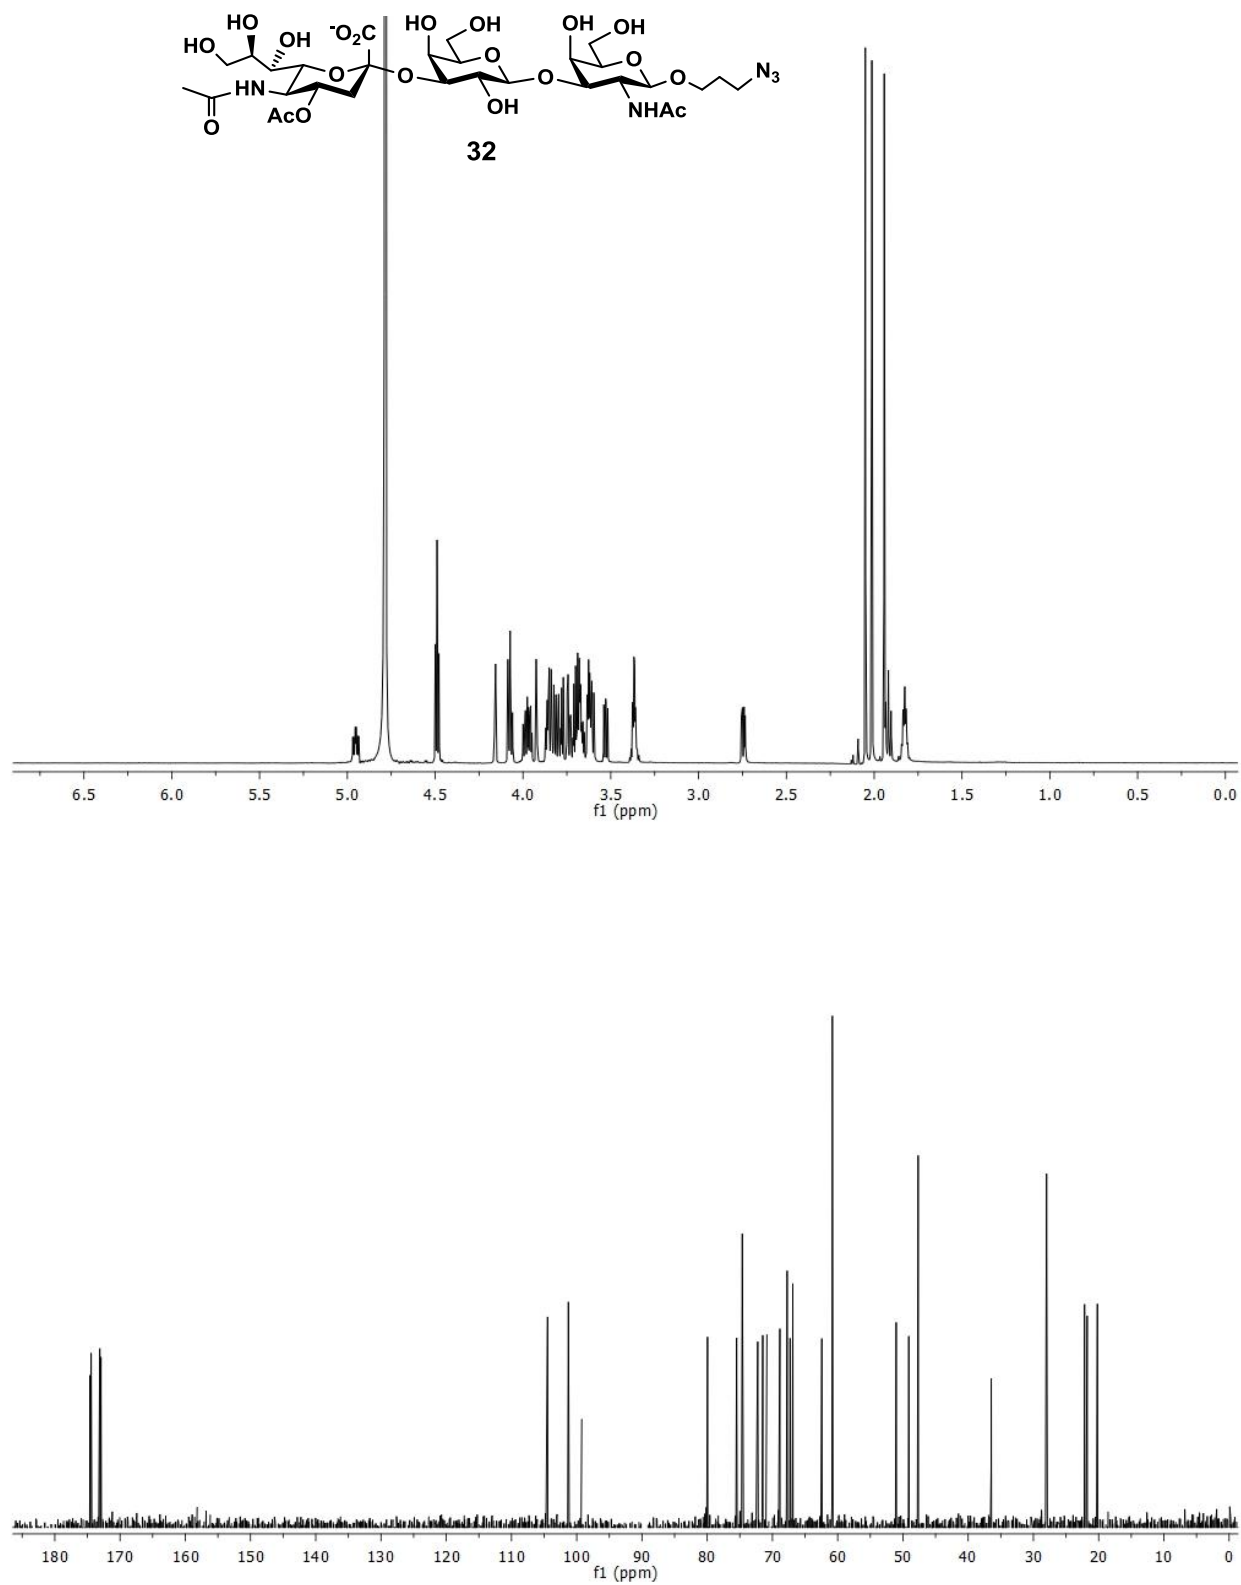

$^1\text{H}$  and  $^{13}\text{C}$  NMR spectra of Neu4,5Ac $_2$  $\alpha$ 3Gal $\beta$ 3GalNAc $\alpha$ ProN $_3$  (**33**)

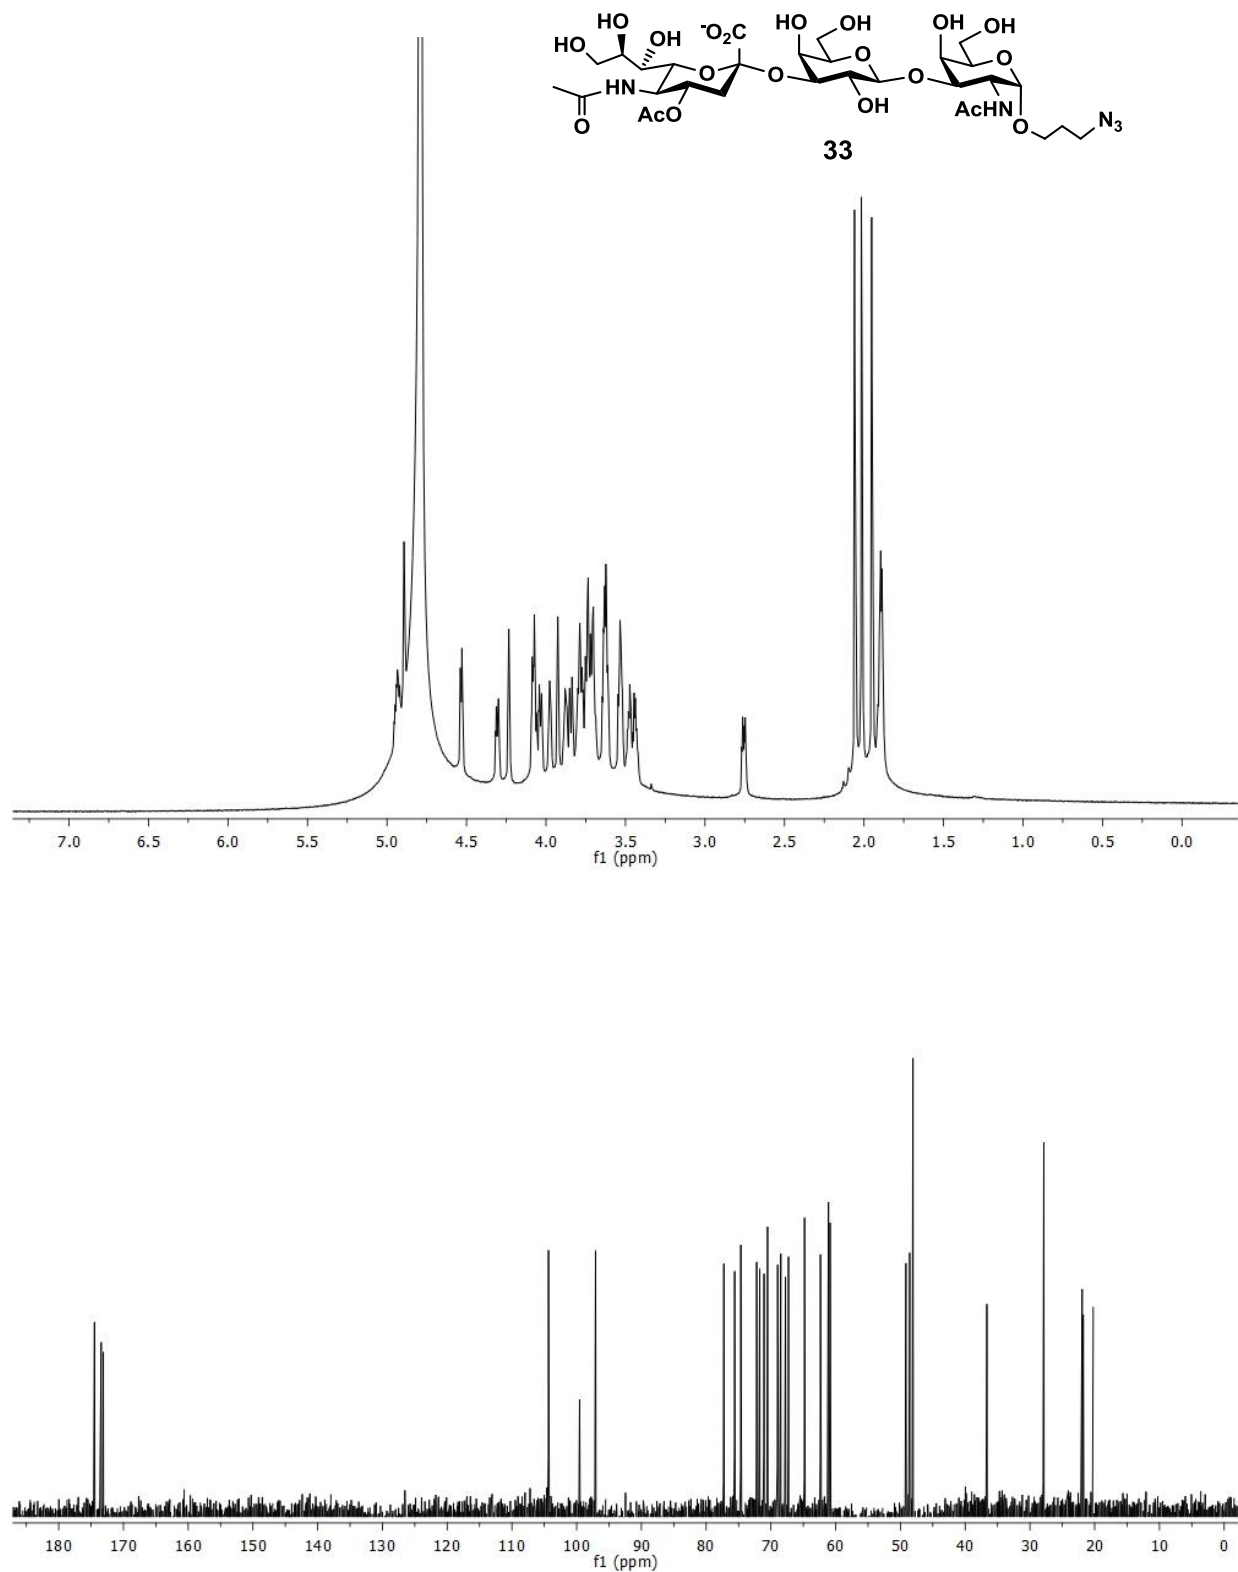

$^1\text{H}$  and  $^{13}\text{C}$  NMR spectra of Neu4,5Ac<sub>2</sub>α3LNnTβProN<sub>3</sub> (**34**)

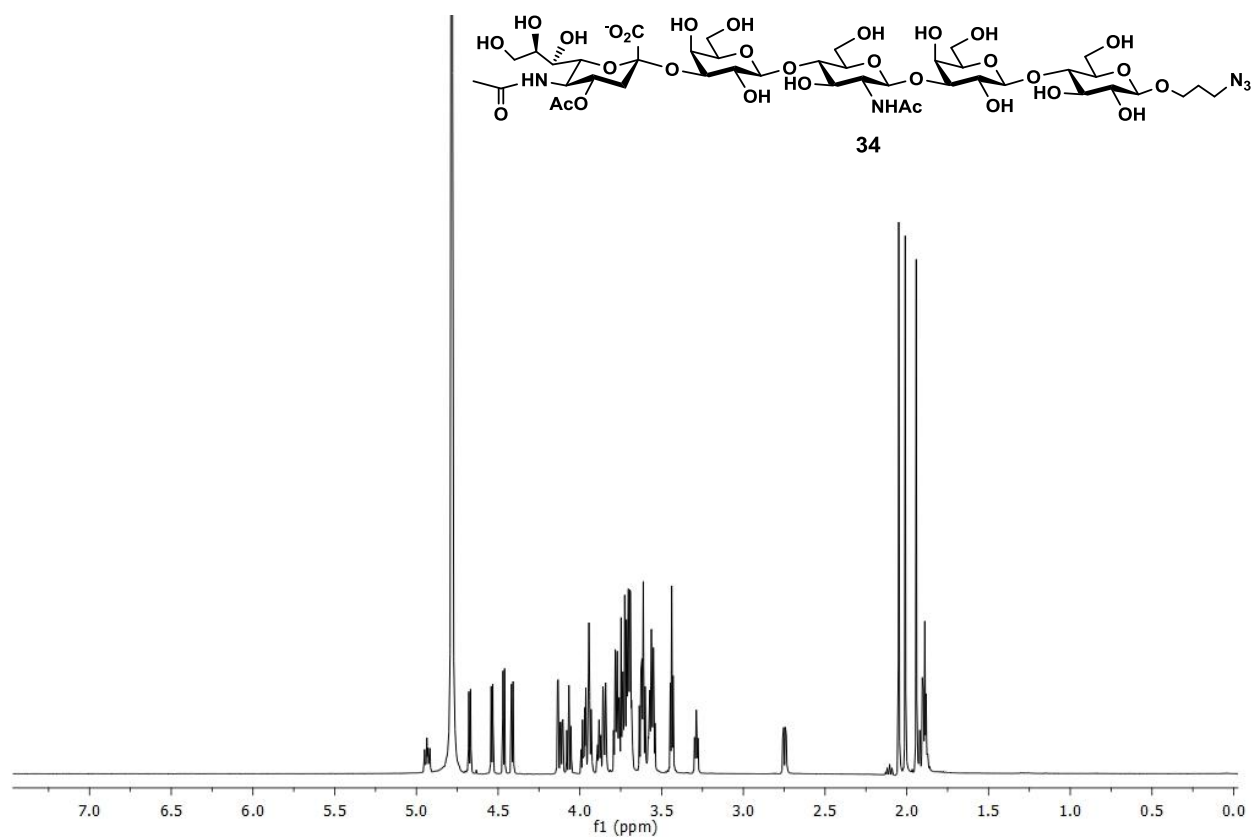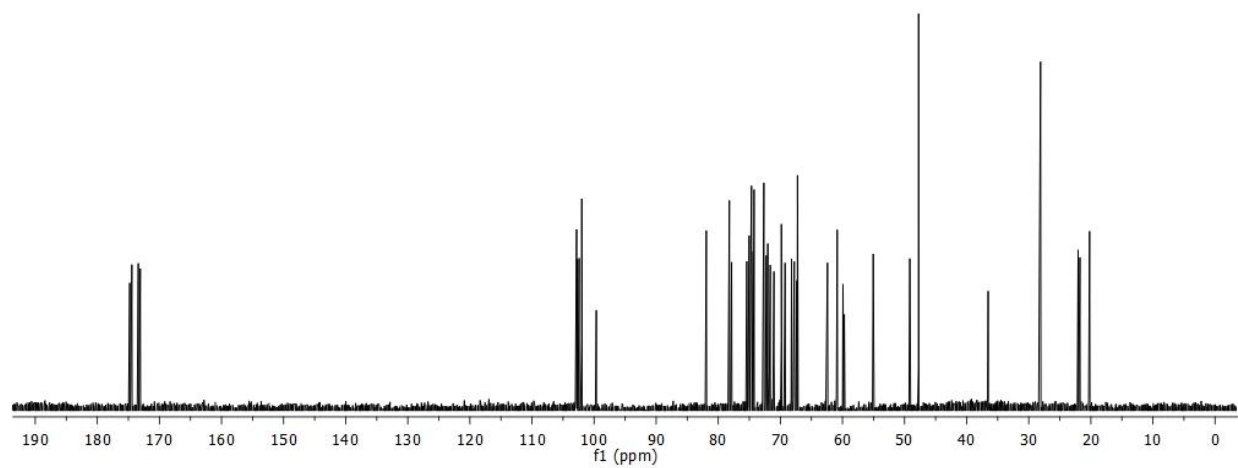

$^1\text{H}$  and  $^{13}\text{C}$  NMR spectra of Neu4Ac5Gc $\alpha$ 3Lac $\beta$ ProN $_3$  (**35**)

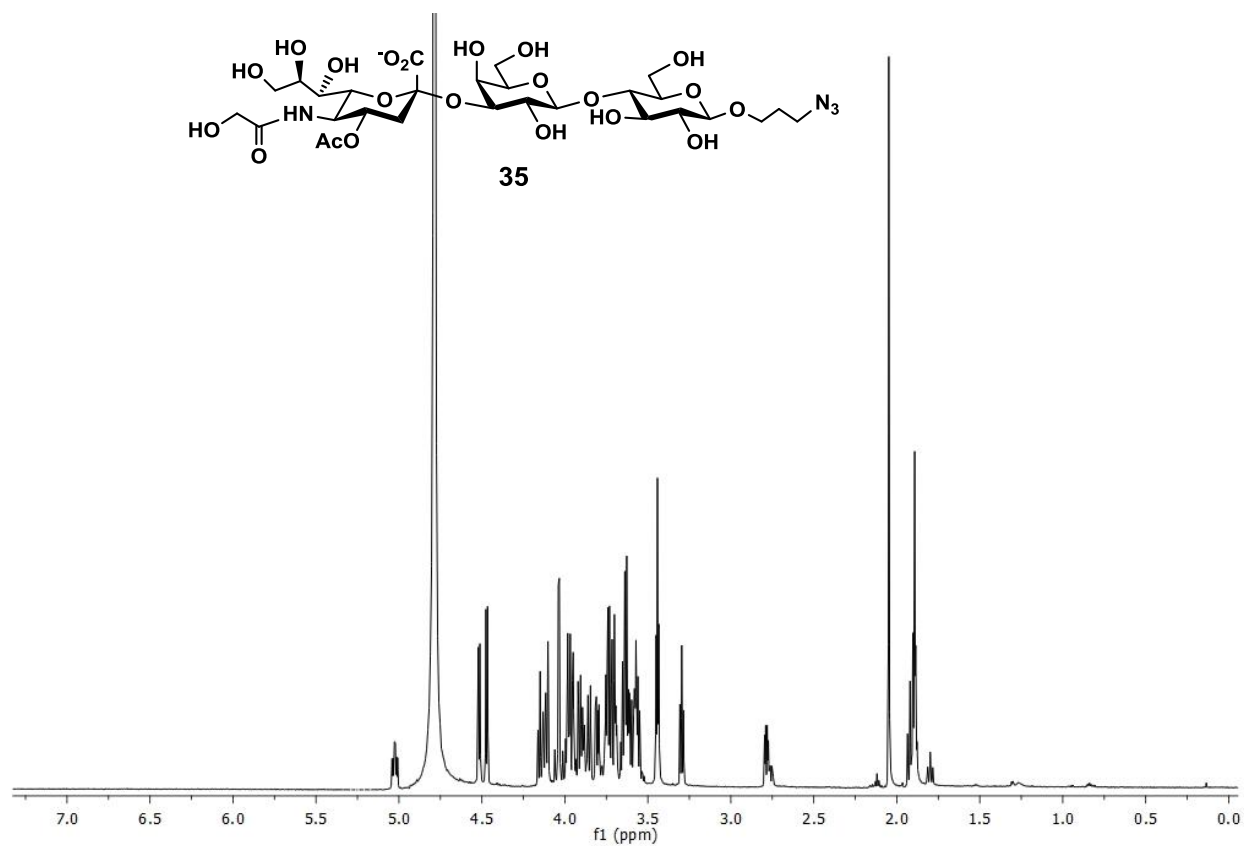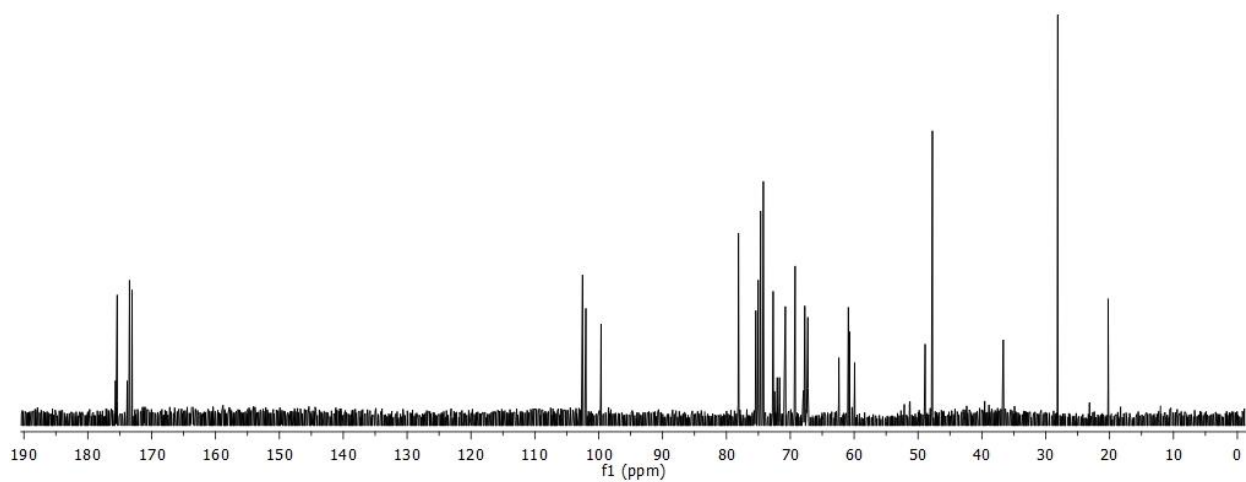

$^1\text{H}$  and  $^{13}\text{C}$  NMR spectra of Neu4Ac5Gc $\alpha$ 3LacNAc $\beta$ ProN $_3$  (**36**)

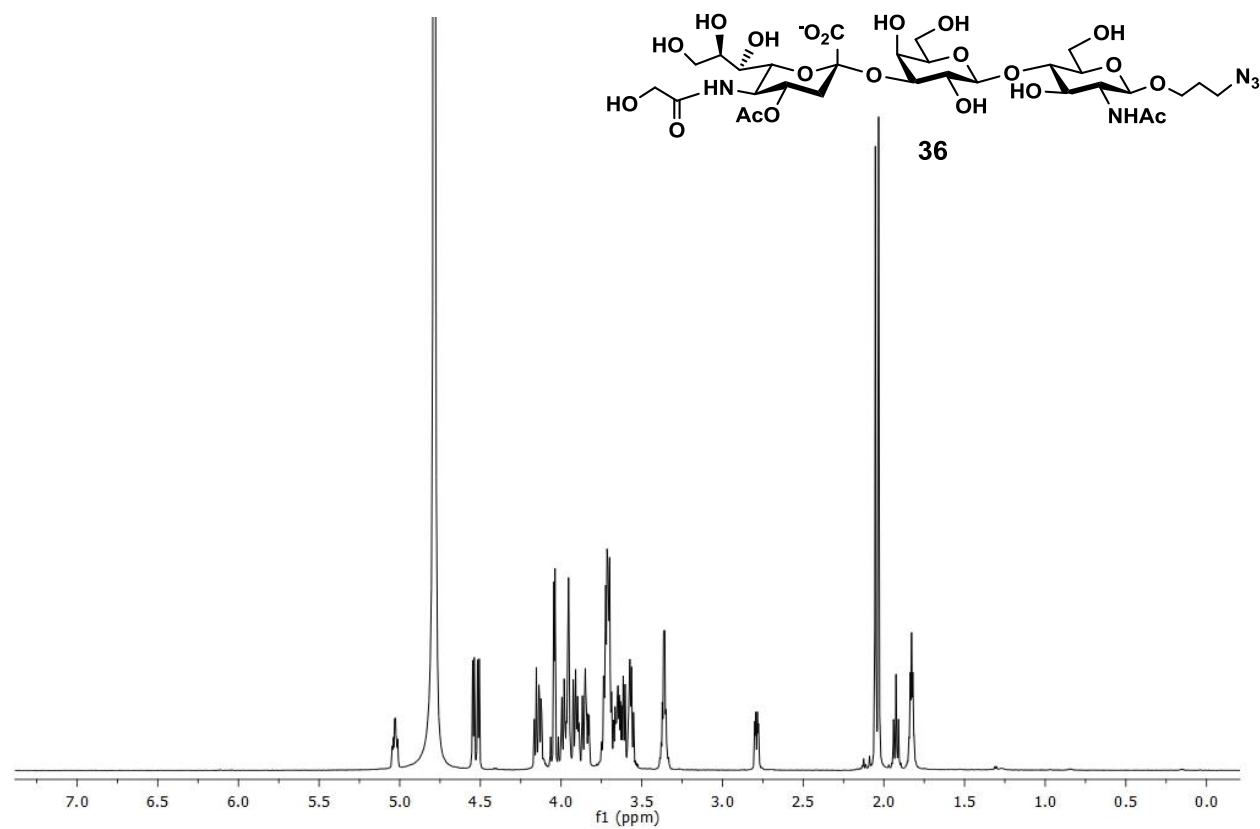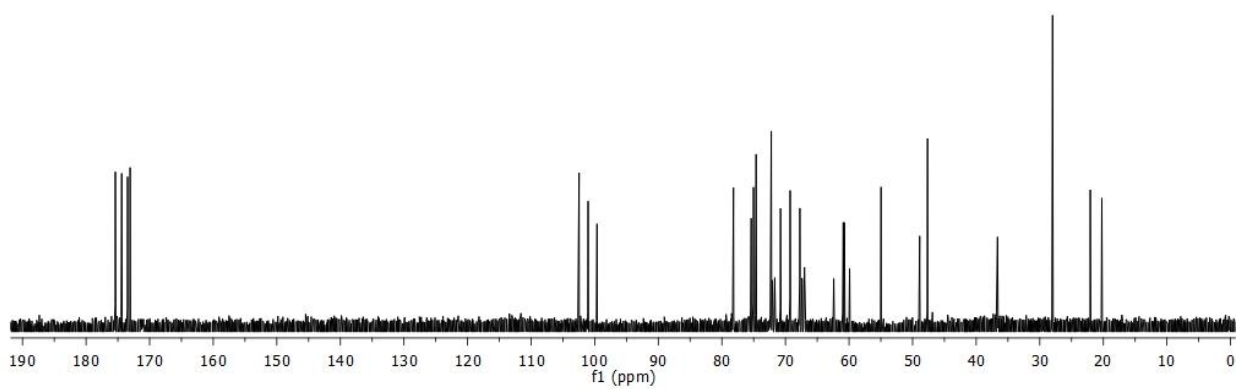

$^1\text{H}$  and  $^{13}\text{C}$  NMR spectra of Neu4Ac5Gc $\alpha$ 3Gal $\beta$ 3GlcNAc $\beta$ ProN $_3$  (**37**)

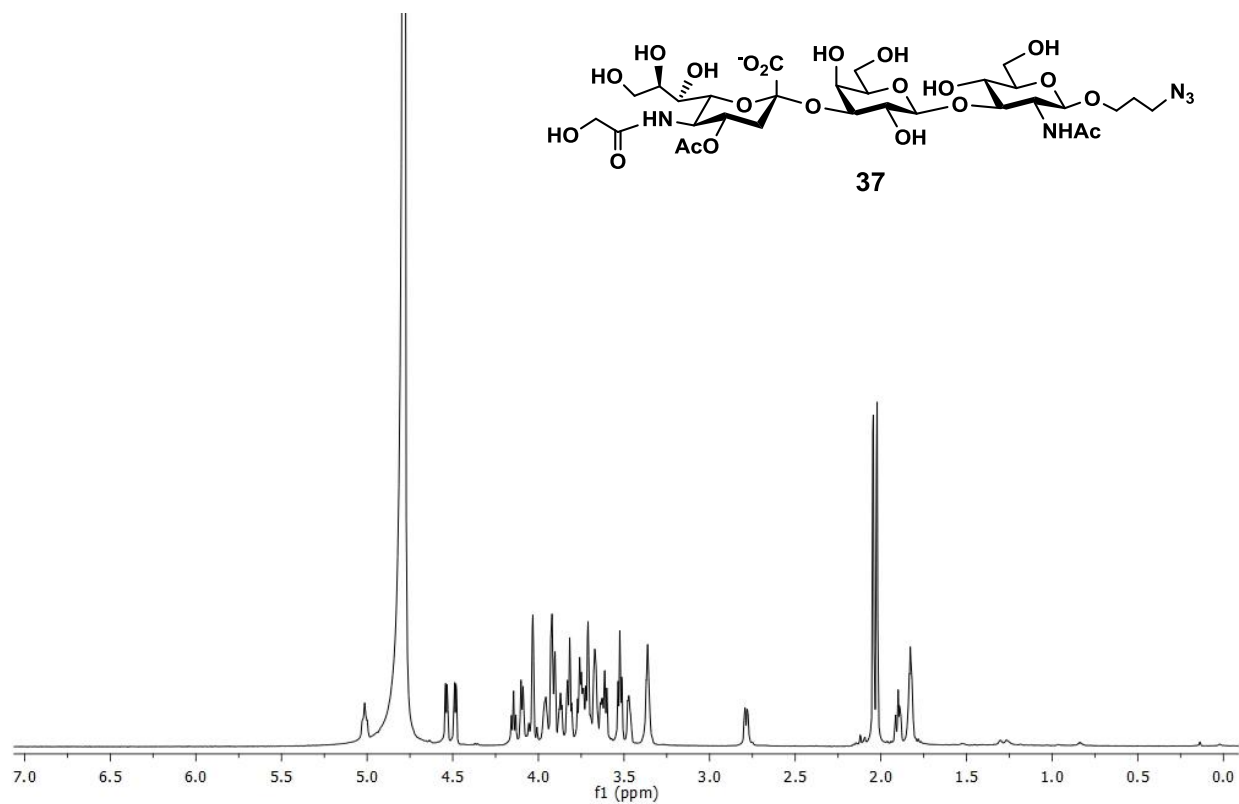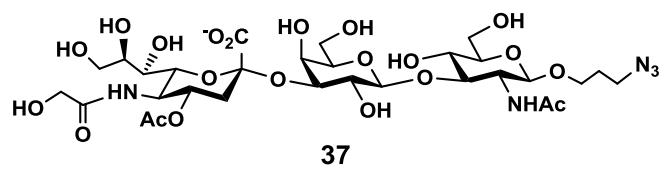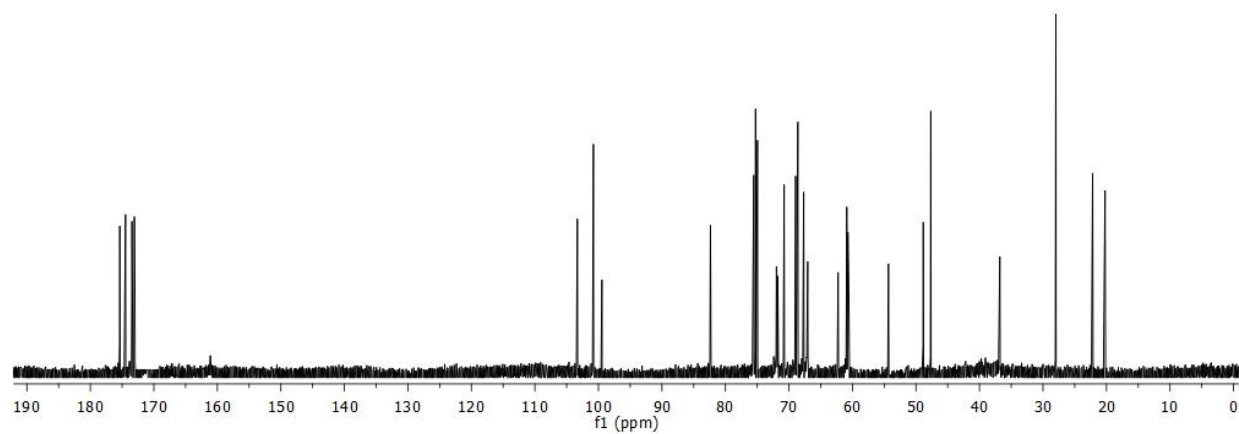



$^1\text{H}$  and  $^{13}\text{C}$  NMR spectra of Neu4Ac5Gc $\alpha$ 3Gal $\beta$ 3GlcNAc $\alpha$ ProN $_3$  (**38**)

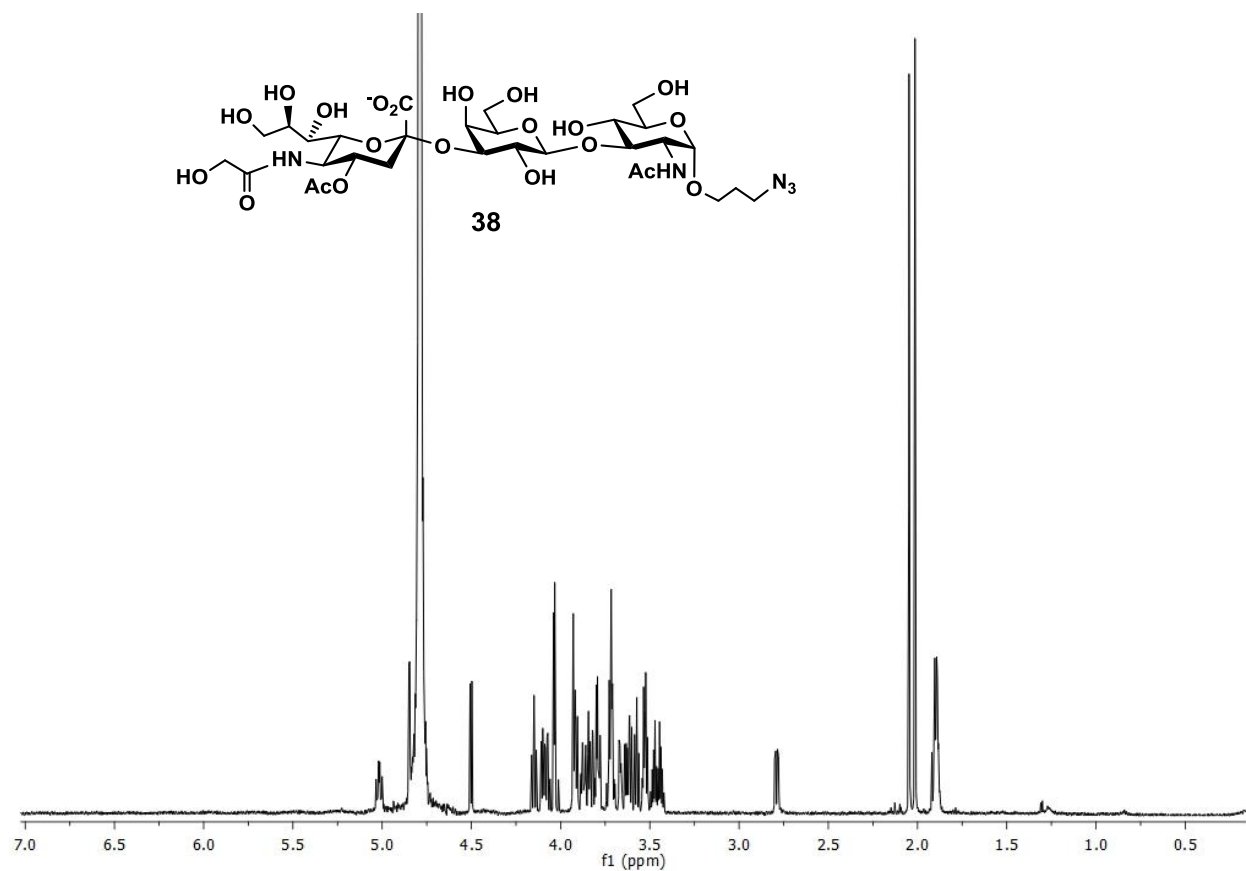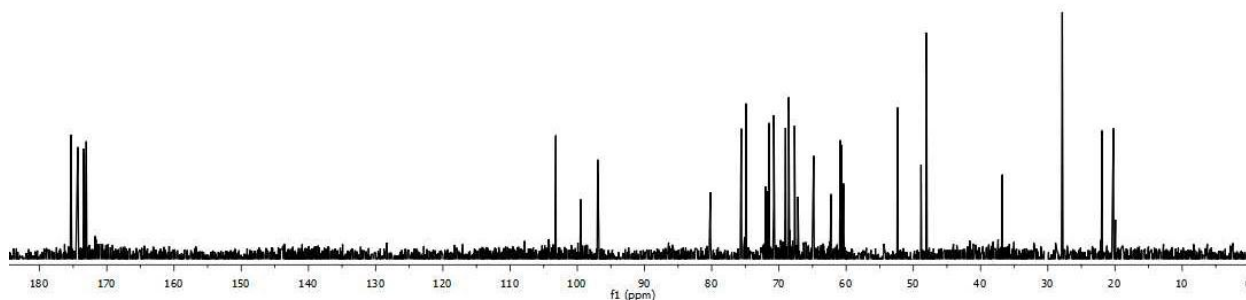

$^1\text{H}$  and  $^{13}\text{C}$  NMR spectra of Neu4Ac5Gc $\alpha$ 3Gal $\beta$ 3GalNAc $\beta$ ProN $_3$  (**39**)

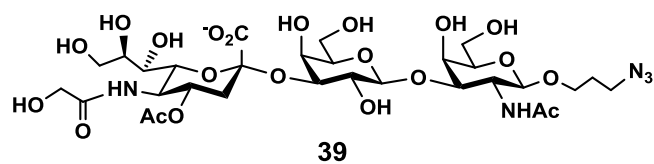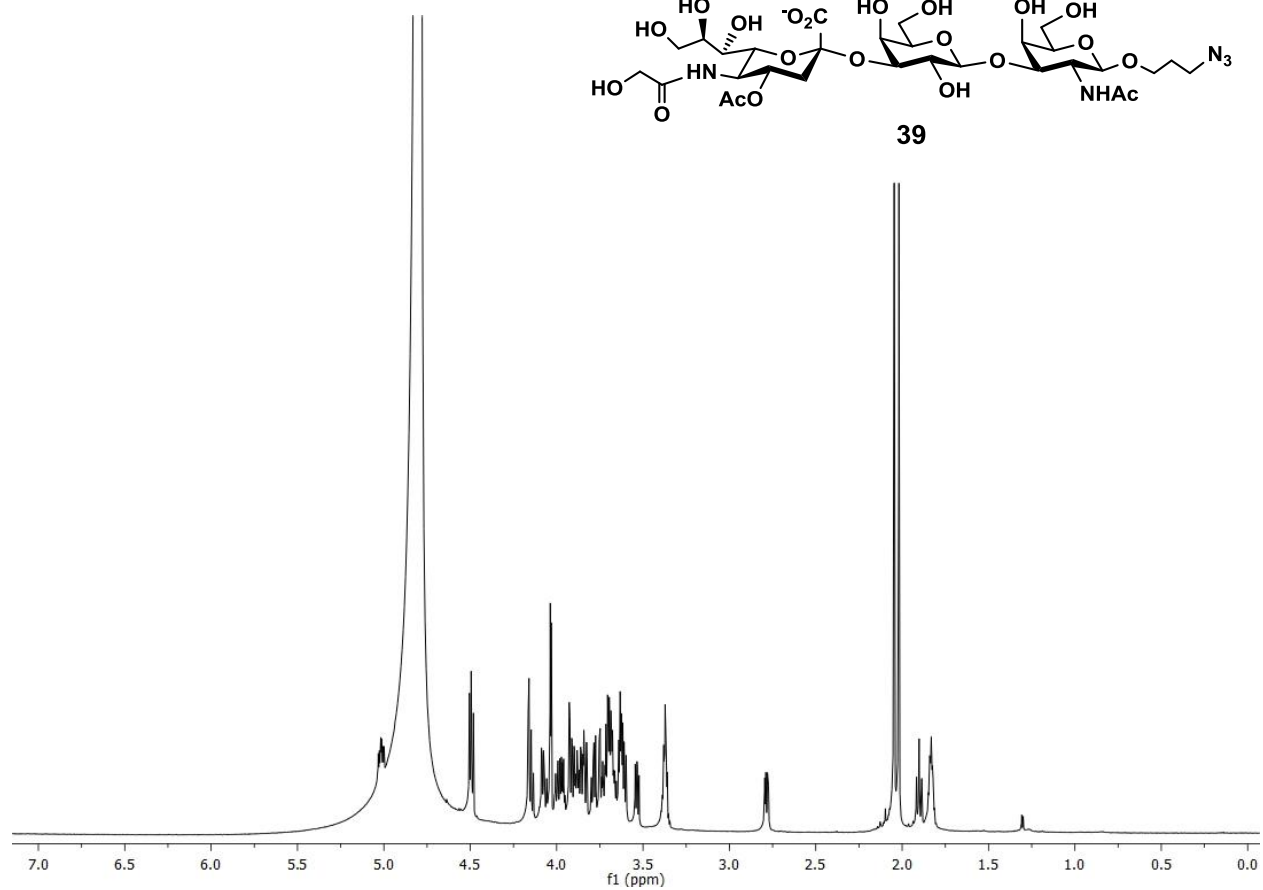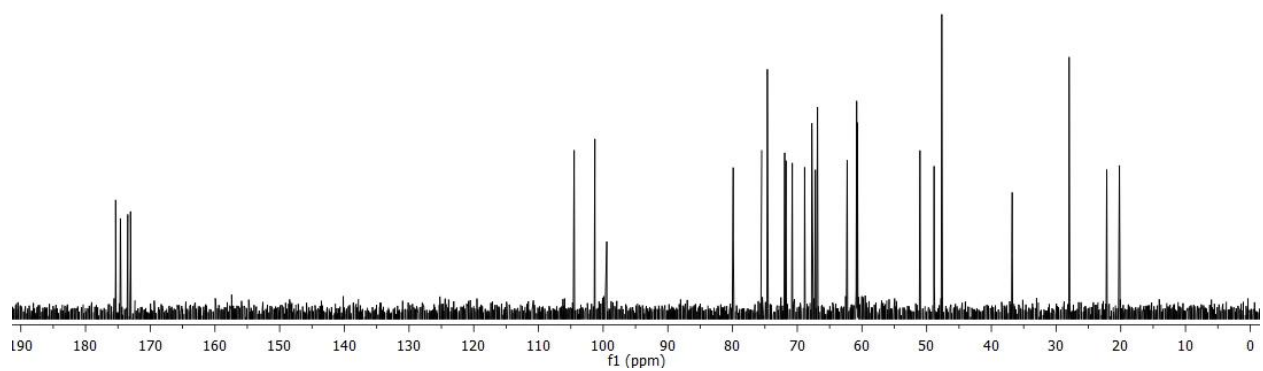

$^1\text{H}$  and  $^{13}\text{C}$  NMR spectra of Neu4Ac5Gc $\alpha$ 3Gal $\beta$ 3GalNAc $\alpha$ ProN $_3$  (**40**)

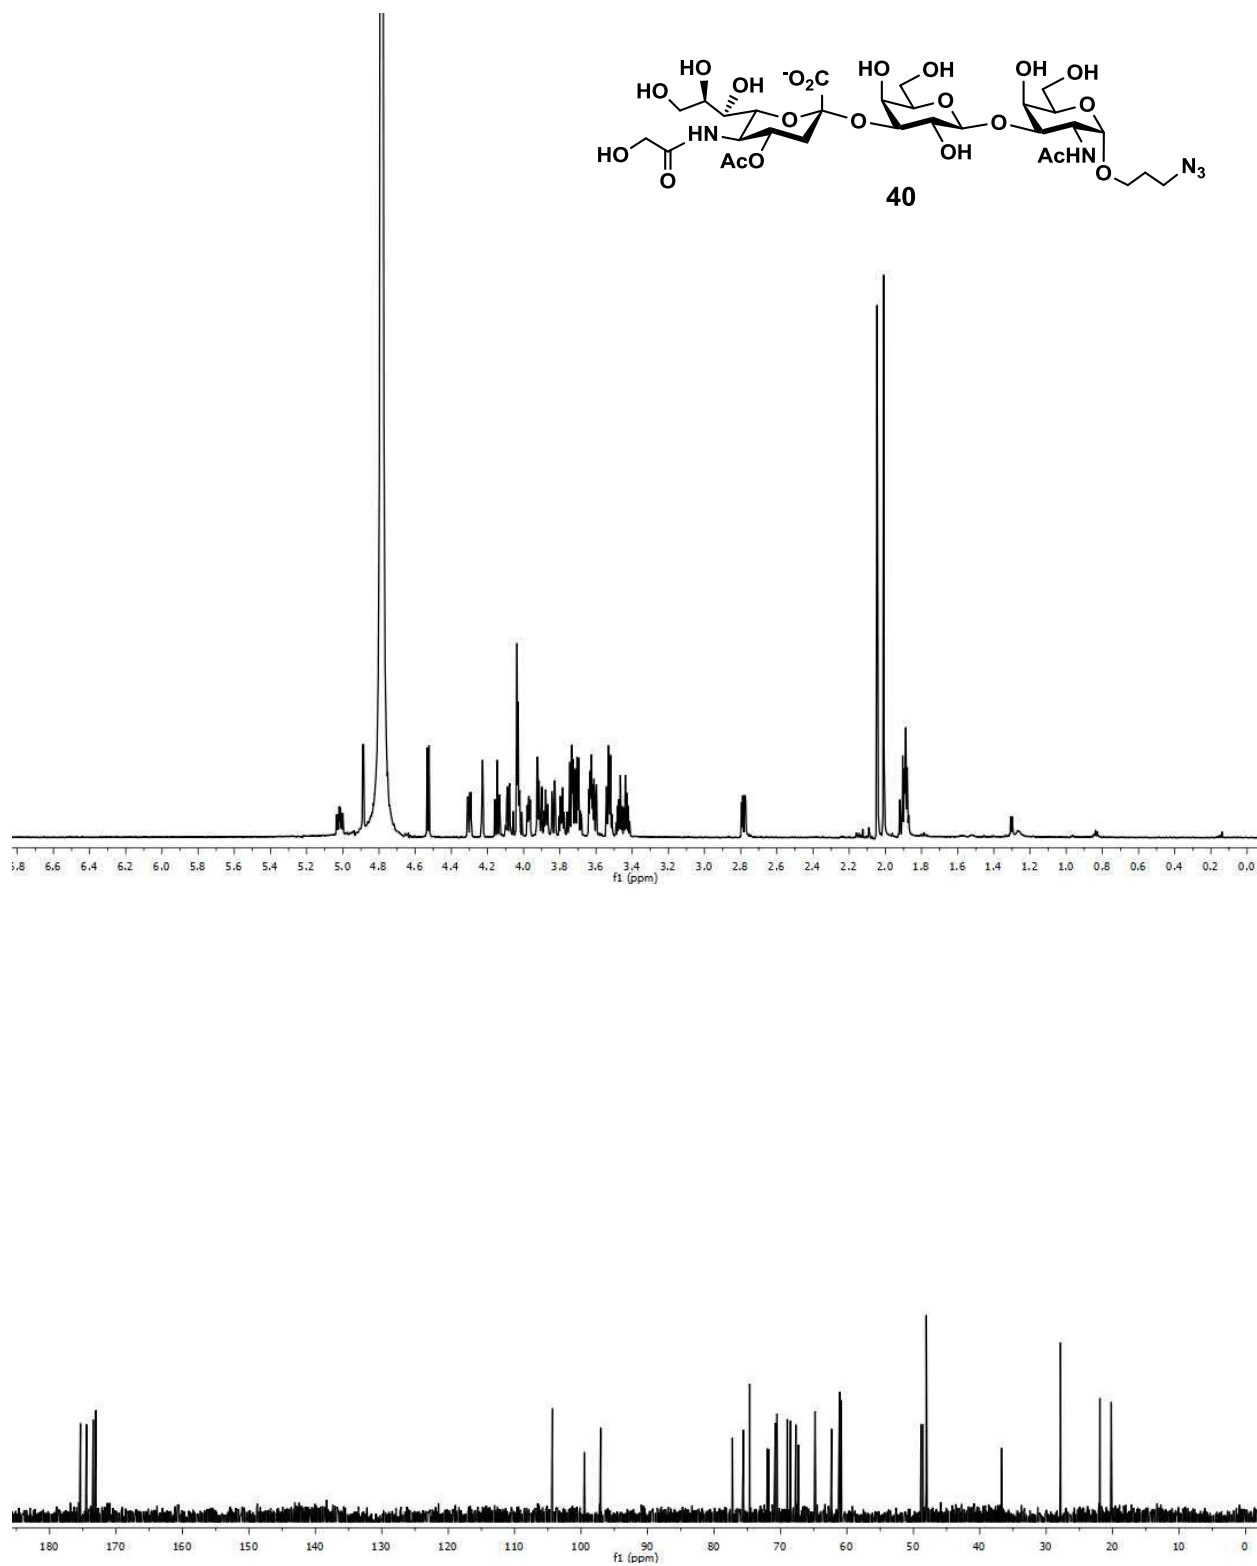

$^1\text{H}$  and  $^{13}\text{C}$  NMR spectra of Neu4Ac5Gc $\alpha$ 3LNnT $\beta$ ProN $_3$  (**41**)

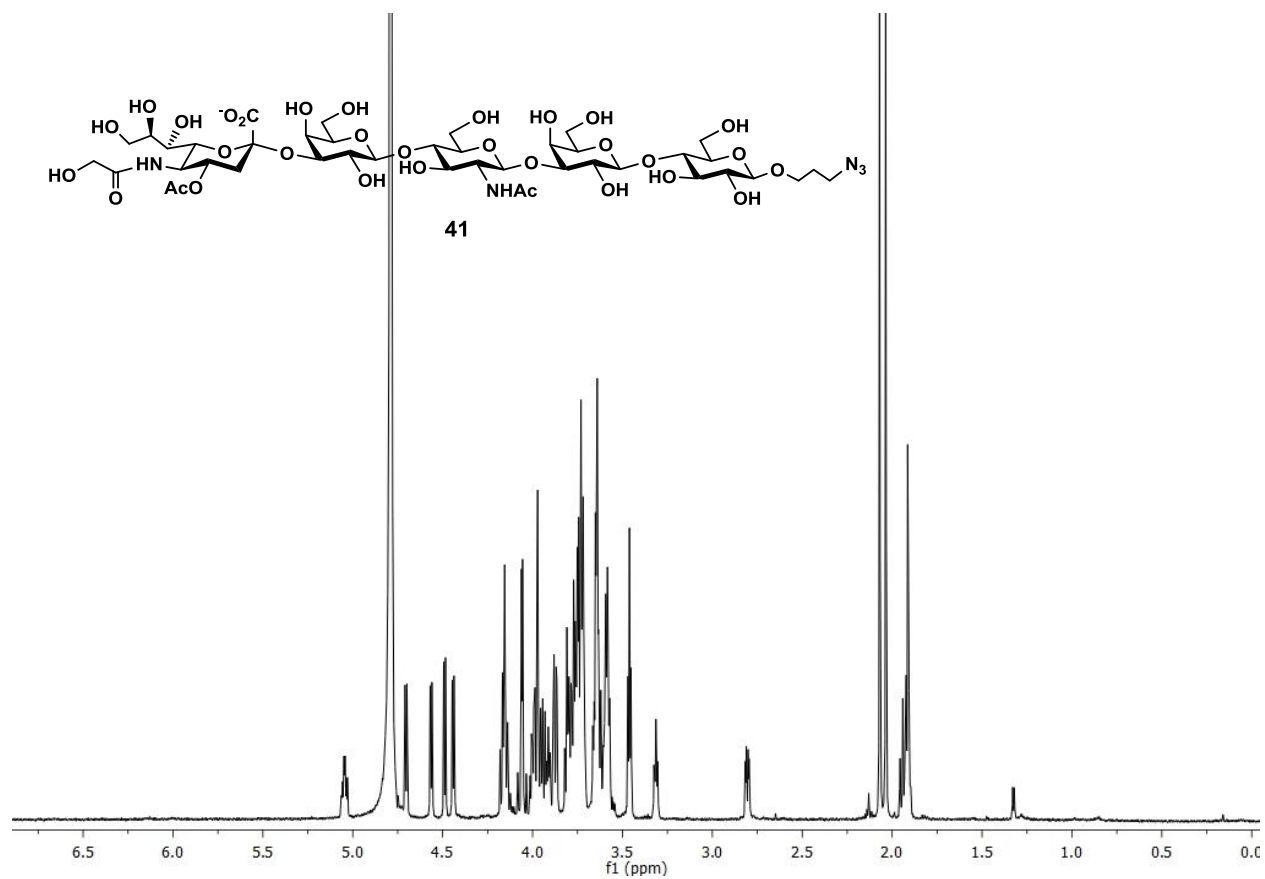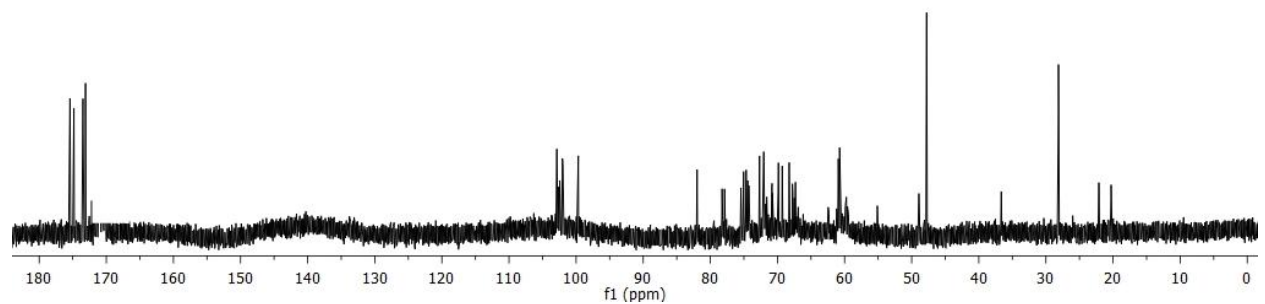

Supplement: NIHMS812153-supplement-ESI.pdf [file NIHMS812153-supplement-ESI.pdf]
